1 Methods

2 **Causal Mediation Analysis with Multiple Causally Ordered and**  
3 **Non-ordered Mediators based on Summarized Genetic Data**

4 Lei Hou<sup>1,2</sup>, Yuanyuan Yu<sup>1,2</sup>, Xiaoru Sun<sup>1,2</sup>, Xinhui Liu<sup>1,2</sup>, Yifan Yu<sup>1,2</sup>, Ran Yan<sup>1,2</sup>, Hongkai  
5 Li<sup>1,2\*†</sup>, Fuzhong Xue<sup>1,2\*†</sup>

6 † Fuzhong Xue and Hongkai Li contributed equally to this work.

7 1. Institute for Medical Dataology, Cheeloo College of Medicine, Shandong University, Jinan,  
8 People's Republic of China, 250000

9 2. Department of Epidemiology and Health Statistics, School of Public Health, Cheeloo  
10 College of Medicine, Shandong University, Jinan, People's Republic of China, 250000

11 **Corresponding author:**

12 1. Fuzhong Xue, E-mail: [xuefzh@sdu.edu.cn](mailto:xuefzh@sdu.edu.cn), Telephone: 13906405997,

13 Address: School of public health, Shandong University, 44 Wenhua West Road,  
14 Jinan, Shandong province, China

15 2. Hongkai Li, E-mail: [lihongkaiyouxiang@163.com](mailto:lihongkaiyouxiang@163.com), Telephone: 18310601363,

16 Address: School of public health, Shandong University, 44 Wenhua West Road,  
17 Jinan, Shandong province, China

18 **Short title:** Causal Mediation Analysis with Multiple Mediators based on Summarized Genetic  
19 Data

20 **Conflicts of Interest**

21 None declared

## 22 **Source of Funding**

23 FX was supported by the National Natural Science Foundation of China (Grant 81773547)  
24 and Shandong Provincial Key Research and Development project (2018CXGC1210). HL was  
25 supported by the National Natural Science Foundation of China (Grant 82003557).

## 26 **Availability of data and materials**

27 GWAS summary data for BMI, Lipids and CVD are publicly available at  
28 [https://portals.broadinstitute.org/collaboration/giant/index.php/GIANT\\_consortium\\_data\\_file](https://portals.broadinstitute.org/collaboration/giant/index.php/GIANT_consortium_data_files)  
29 s, <http://lipidgenetics.org/> and <http://www.cardiogramplusc4d.org/>, respectively. Code to  
30 implement the method and reproduce all simulations and analyses is available on Github  
31 (<https://github.com/hhoulei/PSEMR>).

## 32 **Ethics approval and consent to participate**

33 Ethical approval was not sought, because this study involved analysis of publicly available  
34 summary-level data from GWASs, and no individual-level data were used.

## 35 **Authors' contributions**

36 HL and FX conceived the study. LH, HL contributed to theoretical derivation with assistance  
37 from YY, XL and XS. LH, RY and YY contributed to the data simulation. LH, HL and SS  
38 contributed to the application. LH and HL wrote the manuscript with input from all other  
39 authors. All authors reviewed and approved the final manuscript.

## 40 **Acknowledgements**

41 We would like to thank Editage ([www.editage.com](http://www.editage.com)) for English language editing.

42 **Abstract**

43 Causal mediation analysis aims to investigate the mechanism linking an exposure and an  
44 outcome. Dealing with the impact of unobserved confounders among the exposure, mediator  
45 and outcome has always been an issue of great concern. Moreover, when multiple mediators  
46 exist, this causal pathway intertwines with other causal pathways, making it more difficult to  
47 estimate of path-specific effects (PSEs). In this article, we propose a method (PSE-MR) to  
48 identify and estimate PSEs of an exposure on an outcome through multiple causally ordered  
49 and non-ordered mediators using Mendelian Randomization, when there are unmeasured  
50 confounders among the exposure, mediators and outcome. Additionally, PSE-MR can be used  
51 when pleiotropy exists, and can be implemented using only summarized genetic data. We also  
52 conducted simulations to evaluate the finite sample performances of our proposed estimators  
53 in different scenarios. The results show that the causal estimates of PSEs are almost unbiased  
54 with good coverage and Type I error properties. We illustrate the utility of our method  
55 through a study of exploring the mediation effects of lipids in the causal pathways from body  
56 mass index to cardiovascular disease.

57 **Key words:** mediation analysis, multiple mediators, causally ordered mediators, causally  
58 non-ordered mediators, Mendelian randomization, summarized genetic data

59 **Author summary**

60 A new method (PSE-MR) is proposed to identify and estimate PSEs of an exposure on an  
61 outcome through multiple causally ordered and non-ordered mediators using summarized  
62 genetic data, when there are unmeasured confounders among the exposure, mediators and  
63 outcome. Lipids play important roles in the causal pathways from body mass index to  
64 cardiovascular disease  
65

## 66 **1 Introduction**

67 Mediation analyses help to uncover the mechanisms underlying causal relationships between  
68 an exposure and an outcome by using mediator variables [1]. In mediation analyses, the total  
69 effect of an exposure on an outcome is partitioned into indirect and direct effects. Indirect  
70 effects act through mediators of interest, whereas direct effects are determined by fixing the  
71 mediator at a specified level. Estimating direct and indirect effects via existing methods  
72 typically requires a stringent sequential ignorability assumption [2] that no unmeasured  
73 confounders exist among the exposure, mediators and outcome [3]. However, this assumption  
74 may not hold in practice and omitting important confounders will necessarily bias results [4].  
75 When multiple intermediate variables ( $M_1$  and  $M_2$ ) are involved in a study, three types of  
76 mediators with respect to  $M_1$  and  $M_2$  may arise, as shown in Figure 1. In Figure 1A,  $M_1$  is  
77 conditionally independent of  $M_2$  given the treatment ( $X$ ) and measured covariates [5]. In  
78 Figure 1B,  $M_1$  and  $M_2$  are not causally ordered because they are independent of each other,  
79 conditional upon the treatment ( $X$ ) and measured covariates [6]. In Figure 1C, mediators are  
80 causally ordered, and  $M_1$  is treated as a mediator-outcome confounder affected by the  
81 treatment. If we are interested in the mediator  $M_2$ , we get a two-way decomposition into an  
82 indirect effect through  $M_2$  and a direct effect (not through  $M_2$ ). Imai and Yamamoto [7]  
83 proposed an approach for all the three types of mediators under a linear structural equation  
84 model. Daniel et al. [8] considered the finest possible decomposition of the total effect when  
85 there are two causally ordered mediators, and evaluated each path-specific effect (PSE) under

86 the counterfactual framework. Additionally, VanderWeele and Vansteelandt [9] regarded the  
87 multiple mediators simultaneously as joint mediators, and defined the “joint” natural direct  
88 and indirect effects as extensions of the usual two-way decomposition of the total effect using  
89 regression-based approach and weighting approach. Several methods [10-16] have been  
90 developed to relax the sequential ignorability assumption. However, none of them allowed for  
91 the simultaneous existence of unmeasured confounders among the exposure, mediators and  
92 the outcome.

93 Mendelian randomization (MR) analyses [17] using summarized data have recently  
94 become popular due to the increase in public availability of suitable data in large sample sizes  
95 from recently published genome-wide association studies [18]. For instance, Tikkanen E et al.  
96 (2019) performed a two-sample MR to evaluate independent causal roles of body components  
97 (fat-free mass and fat mass) on atrial fibrillation (AF) [19]. Firstly, univariate MR was used to  
98 estimate the causal effect of fat-free mass on AF by leveraging genetic variants (instrumental  
99 variables). Some genetic variants may be associated with both fat-free mass and fat mass,  
100 which is problematic because fat mass is also associated with AF. These genetic variants are  
101 invalid because they violate the assumption of exclusion restriction, since – they unlock the  
102 pathway from genetic variants to AF not via fat-free mass. This phenomenon is called  
103 horizontal pleiotropy, and fat mass is considered a pleiotropic trait [20]. In order to eliminate  
104 the effect of pleiotropy on causal estimation, multivariable MR [21] was performed to  
105 evaluate the causal role of fat-free mass on AF independent of fat mass. Similarly, we can

106 obtain the causal effect of fat mass on AF independent of fat-free mass.

107 Risk factors associated with genetic variants may not always be pleiotropic traits, rather  
108 they may be mediators in the causal pathway from the exposure to the outcome (Figure 1D).  
109 In this case, these genetic variants are still valid instruments and MR can be used for  
110 mediation analysis. Burgess S et al. (2017) showed that total and direct effects in a single  
111 mediator setting can be estimated by univariate and multivariable MR analyses, respectively  
112 [22]. We will review this in Section 2.1. In Section 2.2, we extend the analysis from a single  
113 mediator setting to a multiple mediators setting (PSE-MR) for both causally ordered and  
114 non-ordered mediators. Then in Section 3, we apply our method to estimate PSEs from body  
115 mass index (BMI) to cardiovascular disease (CVD) through lipids mediators. In Section 4, we  
116 conduct simulations to compare the performance of PSE-MR in different scenarios. Finally,  
117 we discuss the methods and results of this study and its potential for application. R package  
118 *PSEMR* for implementing PSE-MR is provided in Github  
119 (<https://github.com/hhoulei/PSEMR>).

## 120 **2 Methods**

121 Throughout, we let  $X$ ,  $Y$ ,  $M$  and  $G$  denote the exposure, outcome, mediator and genetic  
122 variant, respectively.  $U$  denotes a set of baseline covariates and potential confounders of the  
123 mediators, exposure and outcome relationships. We also let  $\theta_0$ ,  $\alpha_1$  and  $\delta_1$  denote the effect of  
124  $X$  on  $Y$ ,  $X$  on  $M$  and  $M$  on  $Y$ , respectively. The subscript  $j$  ( $j = 1, \dots, J$ ), denotes the  $j$ -th genetic  
125 variant. Increasingly, MR analyses are implemented using summarized data on the

126 associations of each genetic variant with the exposure, mediator and outcome, obtained from  
127 linear regressions on non-overlapping data consortia. This included the beta-coefficients ( $\hat{\beta}_{Xj}$ ,  
128  $\hat{\beta}_{Mj}$ ,  $\hat{\beta}_{Yj}$ ) and their standard errors ( $\text{se}(\hat{\beta}_{Xj})$ ,  $\text{se}(\hat{\beta}_{Mj})$ ,  $\text{se}(\hat{\beta}_{Yj})$ ). If the exposure  $X$  or the  
129 outcome  $Y$  is binary, then these summarized association estimates may be replaced with  
130 association estimates ( $\log(\text{OR})$ ) obtained from logistic regression.

131 Initially, we consider the indirect (through  $M$ ) and direct (not through the above  
132 mediators) effects of an exposure  $X$  on an outcome  $Y$  using genetic variants  $G$ . Then we  
133 declare several assumptions. We assume all genetic variants are uncorrelated (not in linkage  
134 disequilibrium). We also assume all variables are continuous, and relationships between  
135 variables (the genetic associations with the exposure  $X$ , mediator  $M$ , and outcome  $Y$ , and the  
136 causal effects of  $X$  and  $M$  on  $Y$  as well as  $X$  on the  $M$ ) are linear with homogeneity across the  
137 population. In other words, interactions between the exposure ( $X$ ) and mediator ( $M$ ) are not  
138 allowed unless individual data is available. We also assume that the consistency and  
139 composition assumptions in causal mediation analyses hold [24] (see S1 Appendix, Section  
140 1). Note that we relax the assumption of no unmeasured confounders among the exposure  $X$ ,  
141 mediator  $M$ , and outcome  $Y$ , which is required in most studies.

## 142 **2.1 PSE-MR in one mediator setting**

143 In a single mediator setting (Figure 1D), a valid instrumental variable  $G_j$  must satisfy the  
144 following three assumptions:

145 **Assumption 1.** For each  $j(j=1,\dots,J)$ , the instrumental variable  $G_j$  is associated with the



146 exposure  $X$ .

147 This assumption requires that  $G_j$  should be strongly associated with  $X$ , otherwise,  
148 weak instrumental variable bias will exist [25]. The “rule of thumb” advocates that the  $F$   
149 statistic of each instrumental variable should be at least 10 to avoid this bias [26-27] (see S1  
150 Appendix, Section 2.3).

151 **Assumption II.** For each  $j(j=1,\dots,J)$ ,  $G_j \perp U$ , and these three unmeasured confounders  
152 satisfy the following criteria:

- 153 1) There is no additive  $X-U$  interaction on  $M$  and  $Y$ .
- 154 2) There is no additive  $M-U$  interaction on  $Y$ .
- 155 3) There is no confounders of  $M-Y$  relationship induced by  $X$ .

156 In this assumption, we posit that there is no confounders of  $M-Y$  relationship induced by  
157  $X$ , nor any interactions between  $X$  (or  $M$ ) and these confounders [17]. When the interactions  
158 between  $M$  and  $U$  exist, the direct effect of  $X$  on  $Y$  can be identified (see S1 Appendix,  
159 Section 4). Swanson S and VanderWeele T [28] suggested that the E-value can be used to  
160 examine the independence between  $G_j$  and  $U$ , that is, to evaluate the sensitivity of estimates  
161 to confounders between  $G_j$  and  $Y$  (see S1 Appendix, Section 5).

162 **Assumption III.** For each  $j(j=1,\dots,J)$ ,  $G_j \perp Y \mid (X,U), G_j \perp M \mid (X,U)$ .

163 This assumption means that there is no pleiotropy. In other words,  $G_j$  must affect  $Y$   
164 through  $X$ , and the pathways  $G_j \rightarrow M \rightarrow Y$  or  $G_j \rightarrow Y$  (not via  $X$ ) are not allowed. We  
165 examine and relax this assumption in Section 2.1.2.

166 **2.1.1 PSE-MR based on IVW (PSE-IVW)**

167 For each  $j(j=1,\dots,J)$ , we do not allow for direct effects between  $G_j$  and  $M$  ( $\gamma_{1j}=0$ ) as  
168 well as  $G_j$  and  $Y$  ( $\gamma_{0j}=0$ ) (Figure 1D). Based on above three assumptions, the  
169 inverse-variance weighting method (IVW) can provide an estimate of the total effect  $\theta_T$  of  
170  $X$  on  $Y$  by the following weighted regression with the intercept set to zero

171 
$$\hat{\beta}_{Yj} = \theta_T \hat{\beta}_{Xj} + \varepsilon_{Tj}, \quad \varepsilon_{Tj} \sim N(0, se(\hat{\beta}_{Yj})^2). \quad (1)$$

172 The total effect  $\theta_T$  between  $X$  and  $Y$  can be decomposed into a direct effect  
173 ( $\theta_T = \theta_I + \theta_D = \alpha_1 \times \delta_1 + \theta_0$ ) and an indirect effect via  $M$ .

174 Under the framework of multivariable MR, the weighted regression model can be  
175 expanded by including genetic associations with the mediator

176 
$$\hat{\beta}_{Yj} = \theta_0 \hat{\beta}_{Xj} + \delta_1 \hat{\beta}_{Mj} + \varepsilon_{Dj}, \quad \varepsilon_{Dj} \sim N(0, se(\hat{\beta}_{Yj})^2) \quad (2)$$

177 where  $\hat{\theta}_0$  provides an estimate of the direct effect  $\theta_D$ . The indirect effect  $\theta_I$  of exposure  
178 on the outcome can be calculated as  $\theta_{ID} = \theta_T - \theta_D$  (difference indirect effect). It is equivalent  
179 to  $\theta_{IP} = \alpha_1 \times \delta_1$  (product indirect effect), where  $\delta_1$  can be estimated by equation (2) and  $\alpha_1$   
180 can be estimated by the following weighted regression with the intercept set to zero

181 
$$\hat{\beta}_{Mj} = \alpha_1 \hat{\beta}_{Xj} + \varepsilon_{Mj}, \quad \varepsilon_{Mj} \sim N(0, se(\hat{\beta}_{Mj})^2). \quad (3)$$

182 The standard error of the difference and product indirect effects are presented in S1 Appendix,  
183 Section 5. The total effect can also be estimated from individual-level data using the  
184 two-stage least squares (2SLS) method. The direct effect can also be estimated using 2SLS by  
185 regressing the outcome on fitted values of the exposure, and further on fitted values of the

186 mediator [22].

### 187 2.1.2 PSE-MR of a single mediator based on MR-Egger (PSE-Egger)

188 The method proposed by Burgess et al. (2017) has some limitations. This method cannot  
 189 be used if Assumption III is violated, that is, direct effects of  $G_j$  on  $M$  ( $M$  simultaneously  
 190 plays the role of a pleiotropic trait) or  $G_j$  on  $Y$  (pleiotropic pathway) exist. Thus, we relax  
 191 the Assumption III by allowing for direct effects between  $G_j$  and  $M$  ( $\gamma_{1j} \neq 0$ ) as well as  
 192  $G_j$  and  $Y$  ( $\gamma_{0j} \neq 0$ ) (Figure 1D). Without the limitation of intercept set to zero, the causal  
 193 effect of  $X$  on  $Y$  can be obtained by MR-Egger regression. To satisfy the InSIDE assumption  
 194 [23] for MR-Egger, we require

$$195 \beta_{Xj} \perp \gamma_{0j} \perp \gamma_{1j}. \quad (4)$$

196 The total effect  $\theta_T$  can be estimated by the following weighted linear regression

$$197 \hat{\beta}_{Yj} = \gamma_T + \theta_T \hat{\beta}_{Xj} + \varepsilon_{Tj}, \quad \varepsilon_{Tj} \sim N(0, se(\hat{\beta}_{Yj})^2). \quad (5)$$

198  $\theta_T$  can also be decomposed into the direct effect  $\theta_D = \theta_0$  and the product indirect effect  $\theta_{IP}$ ,

199 where  $\theta_D$  can be obtained by multivariable MR-Egger regression:

$$200 \hat{\beta}_{Yj} = \gamma_{0j} + \theta_0 \hat{\beta}_{Xj} + \delta_1 \hat{\beta}_{Mj} + \varepsilon_{Dj}, \quad \varepsilon_{Dj} \sim N(0, se(\hat{\beta}_{Yj})^2). \quad (6)$$

201 The intercept term  $\gamma_{0j}$  that differs from zero is an indicator of direct effect between  $G_j$  and

202  $Y$ , which is called directional pleiotropy. For product indirect effect  $\theta_{IP}$ ,  $\delta_1$  can be estimated

203 by above equation (6), and  $\alpha_1$  can also be obtained by the following multivariable

204 MR-Egger regression:

$$205 \hat{\beta}_{Mj} = \gamma_{1j} + \alpha_1 \hat{\beta}_{Xj} + \varepsilon_{Mj}, \quad \varepsilon_{Mj} \sim N(0, se(\hat{\beta}_{Mj})^2) \quad (7)$$

206 where  $\gamma_{ij}$  that differs from zero is an indicator of direct effect between  $G_j$  and  $M$ . The  
207 estimation of standard error for difference and product indirect effect is presented in the S1  
208 Appendix.

## 209 **2.2 Extending PSE-MR to multiple mediators setting**

210 In this section, we extend the PSE-MR method to a multiple mediators setting. If there are  $n$   
211 mediators  $M_1, M_2, \dots, M_n$  in the causal pathway from  $X$  to  $Y$ , PSEs can be identified. In the  
212 multiple mediators setting, we consider two relationships among mediators: causally  
213 non-ordered and causally ordered, respectively. In both cases, a valid instrumental variable  
214 must satisfy Assumption I mentioned in Section 2.1, and the following Assumption II\* and  
215 III\*, which extend from the Assumption II and III.

216 **Assumption II\***. For each  $i, j (i = 1, \dots, n, j = 1, \dots, J)$ ,  $G_j \perp U$ .

- 217 1) There is no additive  $X - U$  interaction on  $M_i$  and  $Y$ .
- 218 2) There is no additive  $M_i - U$  interaction on  $Y$ .
- 219 3) There is no confounders of  $M_i - Y$  relationship induced by  $X$ .

220 **Assumption III\***. For each  $i, j (i = 1, \dots, n, j = 1, \dots, J)$ ,  $G_j \perp Y \mid (X, U), G_j \perp M_i \mid (X, U)$ .

221 The illustrations and examinations for Assumptions II and III can also be extended to the  
222 multiple mediators setting.

### 223 **2.2.1 PSE-MR for causally non-ordered mediators**

224 Firstly, we consider causally non-ordered mediators (Figure 2A, B), where  $n$  mediators are  
225 independent of each other, conditional on  $X$ . Total effect  $\theta_T$  can also be estimated by

226 equation (1). The direct effect ( $\theta_D = \theta_0$ ) and product indirect effect  $\theta_{IP} = \sum_{i=1}^n \alpha_i \delta_i$  can be  
 227 estimated by the following weighted regressions with the intercept set to zero:

$$228 \quad \mathbf{B} = \Psi \mathbf{A} + \boldsymbol{\varepsilon}, \quad \boldsymbol{\varepsilon} \sim N(\mathbf{0}, \Sigma), \quad \Sigma = \text{diag}(se(\hat{\beta}_{Y_j})^2, se(\hat{\beta}_{M_{1j}})^2, \dots, se(\hat{\beta}_{M_{nj}})^2) \quad (8)$$

$$229 \quad \text{where } \mathbf{B} = \begin{bmatrix} \hat{\beta}_{Y_j} \\ \hat{\beta}_{M_{1j}} \\ \hat{\beta}_{M_{2j}} \\ \vdots \\ \hat{\beta}_{M_{nj}} \end{bmatrix}, \quad \Psi = \begin{bmatrix} \theta_0 & \delta_1 & \delta_2 & \dots & \delta_n \\ \alpha_1 & 0 & 0 & \dots & 0 \\ \alpha_2 & 0 & 0 & \dots & 0 \\ \vdots & \vdots & \vdots & \dots & \vdots \\ \alpha_n & 0 & 0 & \dots & 0 \end{bmatrix}, \quad \mathbf{A} = \begin{bmatrix} \hat{\beta}_{X_j} \\ \hat{\beta}_{M_{1j}} \\ \hat{\beta}_{M_{2j}} \\ \dots \\ \hat{\beta}_{M_{nj}} \end{bmatrix}, \quad \boldsymbol{\varepsilon} = \begin{bmatrix} \varepsilon_{0j} \\ \varepsilon_{1j} \\ \varepsilon_{2j} \\ \vdots \\ \varepsilon_{nj} \end{bmatrix}. \quad \text{These estimations can}$$

230 also be obtained from individual-level data using 2SLS method.

231 Similarly, we relax Assumption III\* by allowing for the direct effect between the  
 232 instrumental variable  $G_j$  and mediators  $M_i$  ( $\gamma_{1j}, \gamma_{2j}, \dots, \gamma_{nj}$ ), as well as  $G_j$  and  $Y$  ( $\gamma_{0j} \neq 0$ )  
 233 (Figure 2B). Under the InSIDE assumption  $\beta_{X_j} \perp \gamma_{1j} \perp \gamma_{2j} \perp \dots \perp \gamma_{nj} \perp \gamma_{0j}$ , the total effect  
 234  $\theta_T$  can also be estimated by equation (5). The direct effect ( $\theta_D = \theta_0$ ) and product indirect  
 235 effect ( $\theta_{IP}$ ) can also be estimated by the following linear regression equations:

$$236 \quad \mathbf{B} = \boldsymbol{\gamma} + \Psi \mathbf{A} + \boldsymbol{\varepsilon}, \quad \boldsymbol{\varepsilon} \sim N(\mathbf{0}, \Sigma), \quad \Sigma = \text{diag}(se(\hat{\beta}_{Y_j})^2, se(\hat{\beta}_{M_{1j}})^2, \dots, se(\hat{\beta}_{M_{nj}})^2) \quad (9)$$

237 where  $\boldsymbol{\gamma} = [\gamma_{0j} \quad \gamma_{1j} \quad \gamma_{2j} \quad \dots \quad \gamma_{nj}]^T$ . Intercept terms  $\gamma_{0j}$  and  $\gamma_{ij}$  ( $i=1, \dots, n$ ) that differ  
 238 from zero are indicators of direct effect between  $G_j$  and  $Y$ , as well as  $G_j$  and  $M_i$ ,  
 239 respectively. Detailed theoretical derivations are presented in S1 Appendix, section 3.

### 240 2.2.2 PSE-MR for causally ordered mediators

241 When all the mediators are causally ordered (Figure 2C, D), we let  $r_{pq}$  denote the direct  
 242 effect of  $M_p$  on  $M_q$ ,  $p, q \in (1, 2, \dots, n)$ ,  $p \neq q$ . The total effect  $\theta_T$  can also be estimated by

243 equation (5). The direct effect ( $\theta_D = \theta_0$ ) and product indirect effect

$$\begin{aligned}
 \theta_{IP} = & \sum_{i=1}^n \alpha_i \delta_i + \sum_{i=2}^n \sum_{j=1}^{i-1} \alpha_i r_{ij} \delta_j + \sum_{i=3}^n \sum_{j=2}^{i-1} \sum_{k=1}^{j-1} \alpha_i r_{ij} r_{jk} \delta_k \\
 & + \dots + \sum_{i=n-1}^n \sum_{j=n-2}^{i-1} \dots \sum_{h=1}^{l-1} \alpha_i r_{ij} \dots r_{lh} \delta_h + \alpha_n r_{n(n-1)} \dots r_{21} \delta_1
 \end{aligned}
 \tag{10}$$

245 can be estimated by the weighted regressions in equation (8) and (9) by substituting  $\Psi^*$  for

246  $\Psi$ , where

$$\Psi^* = \begin{bmatrix} \theta_0 & \delta_1 & \delta_2 & \dots & \delta_n \\ \alpha_1 & 0 & 0 & \dots & 0 \\ \alpha_2 & r_{12} & 0 & \dots & 0 \\ \vdots & \vdots & \vdots & \dots & \vdots \\ \alpha_n & r_{1n} & r_{2n} & \dots & 0 \end{bmatrix}.$$

248 The causal effect  $r_{pq}$  from  $M_p$  to  $M_q$ ,  $p, q \in (1, 2, \dots, n)$ ,  $p \neq q$  can be identified. Details of

249 theoretical derivation are presented in S1 Appendix, section 3. In practice, we can use

250 Mendelian randomization to justify the causal direction of any two mediators. Then we

251 combine the results of causal relationships of any two mediators to obtain the ordering of

252 multiple mediators.

### 253 **3 Application**

254 We attempted to reveal the causal mechanism from body mass index (BMI) to cardiovascular

255 disease (CVD) as an illustrative example. CVD, which includes coronary heart disease, stroke

256 and heart failure, is the leading cause of death worldwide [29]. High BMI is an important risk

257 factor of CVD [30]. Furthermore, dyslipidaemia in obesity is characterized by increased

258 levels of very low density lipoprotein (VLDL) cholesterol, triacylglycerols (TG) and total

259 cholesterol (TC), and lower high density lipoprotein (HDL) cholesterol levels levels [31].

260 Previous studies suggested that a variety of alterations in cardiac structure and function occur  
261 in the individual as adipose tissue accumulates excessively [32]. However, Van Gaal LF et al.  
262 found little evidence that LDL cholesterol is enhanced in obesity [31]. Hence, we aim to  
263 examine whether BMI affects CVD through its influence on HDL and TG.

264 Genetic associations with BMI in 694,649 participants from European were obtained  
265 from the Genetic Investigation of ANthropometric Traits (GIANT) [33]. Genetic associations  
266 with TG and HDL in 188,577 participants were obtained from the Global Lipids Genetics  
267 Consortium (GLGC) [34]. Genetic associations with CVD risk in 22,233 cases and 64,762  
268 controls of European descent were obtained from the CARDIoGRAMplusC4D Consortium  
269 [35]. We identified 285 single-nucleotide polymorphisms (SNPs) associated with BMI as a  
270 genetic instrument with  $F$  statistics greater than 10 (explaining 2.89% of exposure variance),  
271 by extracting the effect sizes for SNP associated with BMI ( $P \leq 5 \times 10^{-8}$ ) from summary  
272 statistics. As the extracted SNPs for BMI might be correlated with each other, we pruned the  
273 variants by linkage disequilibrium (LD) ( $r^2 < 0.01$ , clumping window = 10000 kbp). Then  
274 we tested whether these SNPs violate the exclusion restriction assumption. Firstly we plotted  
275 funnel plot (Figure 3) and found three SNPs were outliers. After removing them, the funnel  
276 plots were more symmetric. The Egger test revealed no significant effects of the mediators,  
277 HDL ( $P = 0.204$ ), TG ( $P = 0.349$ ) and the outcome CVD ( $P = 0.071$ ). These results indicate  
278 the absence of directional pleiotropy. Details of the SNPs are listed in *SI Appendix*.

279 Firstly, we performed a single mediator analysis for the mediators (HDL and TG) via

280 PSE-MR. Table 1 suggests TG and HDL are mediators in the causal pathway from BMI to  
281 CVD. Then we performed PSE-MR analysis with multiple mediators to test whether BMI has  
282 indirect effects on CVD risk through HDL and TG. Although a higher BMI increase the risk  
283 of CVD, no significant direct effect was obtained after adjusting for genetic associations with  
284 TG and HDL. Indirect effects through TG and HDL explained a large proportion of causal  
285 effect from BMI to CVD, and their total mediation proportion (MP) is 93.44%. In conclusion,  
286 three pathways exist from BMI to CVD: BMI→HDL→CVD (MP: 27.1% [17.1, 38.2]), BMI→  
287 TG→CVD (MP: 24.9% [16.3, 34.7]) and BMI→TG→HDL→CVD (MP: 23.7% [2.5, 49.3]).  
288 These results (Figure 4) are consistent with results from a pooled analysis of 97 prospective  
289 cohorts with 1.8 million participants [37] and previously described biological mechanisms  
290 [36, 38].

## 291 **4 Simulation**

### 292 **4.1 Settings**

293 To validate the utility of the PSE-MR method for estimating PSEs, we designed six scenarios:  
294 when Assumption III is satisfied (PSE-IVW) or violated (PSE-Egger) for settings with one  
295 mediator (simulations A, B), multiple causally non-ordered (simulation C, D) and multiple  
296 causally ordered mediators (simulation E, F).

297 We generated data on 25 genetic variants, an exposure ( $X$ ), mediators ( $M$ ), and outcome  
298 ( $Y$ ) for 20,000 individuals. Briefly, we specified different values of the parameters  $\theta_D$  (the  
299 direct effect of  $X$  on  $Y$ ) and  $\theta_I$  (the indirect effect of  $X$  on  $M$ ) to observe performances of



300 our methods. According to the specification of  $\theta_D$  and  $\theta_I$ , simulations from A to F included  
301 four settings: no direct effect, no indirect effect, a direct effect along with a directionally  
302 concordant indirect effect, and a direct effect and a directionally discordant indirect effect.  
303 For PSE-Egger, the data were simulated to consider the following three cases:  
304 **Case (a):** Balanced pleiotropy, InSIDE assumption satisfied;  
305 **Case (b):** Directional pleiotropy, InSIDE assumption satisfied;  
306 **Case (c):** Directional pleiotropy, InSIDE assumption not satisfied.

307 We also performed additional simulations for sensitivity analyses, where bidirectional  
308 causal effects between the exposure and mediators, population homogeneity assumption is  
309 violated, the causal order is misspecified and one of the mediators is missing. In addition, we  
310 also consider the performance of PSE-MR when the exposure and outcome are time varying.  
311 We also find the optimal number of genetic variants when we consider multiple mediators.  
312 Details of the simulation are presented in S2 Appendix.

313 We used the following metrics to evaluate performance of our methods: mean bias,  
314 standard errors (SE), mean square error (MSE), type I error rate for a null causal effect and  
315 empirical power to detect a non-null effect (i.e., the proportion of confidence intervals  
316 excluding zero).

## 317 **4.2 Results**

318 We varied the sample size, the number of instrumental variables, and simulated four scenarios  
319 for different sets of parameter values. We found that causal estimates of direct and indirect

320 effects were unbiased with good Type I error properties. As the sample size increased, bias  
321 and standard errors decreased, while power improved. Higher power and lower bias were  
322 observed as the number of instrumental variables increased (see S2 Appendix, Section 1, 3  
323 and 5).

324 For two non-ordered mediators, PSE-IVW showed good performance of in standard MR  
325 when estimating the total, direct and indirect effects as well as three PSEs (Table 2). As the  
326 sample size and the number of genetic variants increased, the bias was smaller and the type I  
327 error was more stable at approximately 0.05 (see S2 Appendix, Section 3). The performance  
328 of PSE-MR based on IVW and MR-Egger with two non-ordered mediators in Case (a) and  
329 (b), are listed in eTables 9 to12 (see S2 Appendix, section 4). In Case (a), we observed that  
330 the bias was close to zero and Type I error rates was around 0.05 in PSE-MR. PSE-Egger had  
331 less bias and more stable Type I error rates than IVW when directional pleiotropy existed in  
332 at least one pathway from  $G$  to  $Y$  (Case (b)). MR-Egger performed better than IVW in term of  
333 bias, even when the InSIDE assumption was not satisfied (Case (c)). When the pleiotropic  
334 effects through confounders (violating the InSIDE assumption) were 2.5 times larger than the  
335 direct pleiotropic effects (satisfying InSIDE), estimates from PSE-Egger were much less  
336 biased and rejection rates of the causal null hypothesis were much closer to the nominal 5%  
337 rate than those from PSE-IVW were. In all cases, PSE-Egger had smaller MSE and more  
338 stable Type I error rates (0.05) than PSE-IVW when the PSE was zero. Estimators of indirect  
339 effects based on product method had more stable Type I error rates (0.05) than those based on

340 the difference method. Results for the two ordered multiple mediators were similar to those of  
341 two non-ordered mediators (Table 3 and eTables 17-24 in S2 Appendix, section 6). In  
342 addition, the magnitude of  $r_{gp}$  does not influence the performances of PSE-MR. Details are  
343 presented in eTable 15 (see S2 Appendix, section 5).

344 The estimation of direct effect is unbiased regardless of whether bidirectional causal  
345 effects between exposure and mediators exist, or the causal order is misspecified, though the  
346 estimation of PSEs is biased. Heterogeneous populations sometimes introduce bias of causal  
347 estimation for non-ordered and ordered mediators. Note that if we are missing upstream  
348 mediators (e.g.  $M_1$ ),  $M_1$  is the confounder of  $M_2$  and  $Y$  and it is affected by  $X$  (i.e.  $X$ -induced  
349 unmeasured confounder of  $M_2$  and  $Y$ ). Thus the assumption of cross-world independence is  
350 violated. In addition, if we can obtain the information in each time points, PSE-MR can be  
351 applied into time varying exposure and mediators and it can also deal with the bi-directional  
352 relationship between exposure and mediators (see S1 Appendix, section 7-13). Performance  
353 of PSE-MR with different number of SNPs and mediators are listed in the eTable 41-42 and  
354 eFigure 9-10.

## 355 **5 Discussion**

356 In this paper, we develop a method PSE-MR to identify and estimate PSEs from an exposure  
357 on an outcome through the mediator(s) using MR when there are unmeasured confounders  
358 among the exposure, mediators and the outcome. We extend PSE-MR from a single mediator  
359 setting to the multiple mediator setting for both causally ordered and non-ordered mediators,

360 and outline the assumptions required to obtain causal effect. PSE-IVW can be used to explore  
361 the role of multiple mediators in the causal pathways between the exposure and outcome. The  
362 PSE-Egger can be viewed as a sensitivity analysis to provide robustness against both  
363 measured and unmeasured pleiotropy and to strengthen the evidence from the PSE-IVW  
364 analysis.

365 PSE-MR can estimate the direct effects between the exposure and outcome and indirect  
366 effects through mediators when the sequential ignorability assumption [39] in mediation  
367 analyses is relaxed. We compared the assumptions of PSE-MR with traditional mediation  
368 analysis methods in Table 4. Our method requires other independent assumptions. While  
369 Assumptions I and III are testable, there is no accepted method to test for the Assumption II.  
370 Several sensitivity analyses can be performed to examine this assumption, such as the  
371 E-value [28] and heterogeneity test. The validity of multiple mediators PSE-Egger and its  
372 ability to estimate consistent causal effects rely on the InSIDE assumption [21] being  
373 satisfied. When the direct genetic associations with the exposure are independent of the direct  
374 genetic associations with mediators and outcome, the InSIDE assumption is satisfied.  
375 Whereas the InSIDE assumption is plausible in some cases, it sometimes will not always be  
376 valid. For example, heterogeneous populations and misspecification of the multiple mediators  
377 would bias the mediation effect estimation. When  $\gamma_{kj}$  is not independent from each other or  
378  $\gamma_{0j}$  is not independent with  $\gamma_{kj}$  for  $k = 1, \dots, n$  (e.g. we are missing one of multiple  
379 mediators), the direct effect is downward-biased and the indirect effect is upward-biased.

380 According to our simulation, we find that PSE-IVW is more robust in estimating causal effect  
381 than PSE-Egger for heterogeneous populations and misspecified multiple mediators.  
382 However, PSE-Egger can be applied to test directional pleiotropy, and it can give less biased  
383 estimates when the InSIDE assumption is violated.

384 For the multiple causally ordered mediator settings, PSE-MR can be widely used in  
385 time-varying exposure and mediators. Labrecque and Swanson (2019) [40] suggested that if  
386 the genetic associations of the exposure and mediators were time-varying, the lifetime effect  
387 estimate could be biased if we obtained the information of the exposure and mediators only at  
388 one time point. However, if we can obtain the information of the exposure and mediators at  
389 different time points, PSE-MR can provide unbiased estimates of the lifetime effects of the  
390 exposure and mediators on the outcome and other PSEs (see S2 Appendix, section 9). Thus  
391 PSE-MR can estimate each PSEs, including the causal relationships (which may potentially  
392 be bi-directional) in a non-experimental setting.

393 In conclusion, we propose a method of causal mediation analysis with causally ordered  
394 and non-ordered mediators based on summarized genetic data and provides a new perspective  
395 for mediation analysis.

396

## Reference

- 397 [1]. Lee, H., Herbert, R. D., & McAuley, J. H. (2019). Mediation Analysis. *JAMA*, 321(7),  
398 697–698. <https://doi.org/10.1001/jama.2018.21973>
- 399 [2]. Kosuke, Imai, Luke, Keele, Teppei, & Yamamoto. (2010). Identification, inference and  
400 sensitivity analysis for causal mediation effects. *Statistical Science*.
- 401 [3]. Fulcher, I. R., Shi, X., & Tchetgen Tchetgen, E. J. (2019). Estimation of Natural Indirect  
402 Effects Robust to Unmeasured Confounding and Mediator Measurement Error.  
403 *Epidemiology* (Cambridge, Mass.), 30(6), 825–834.  
404 <https://doi.org/10.1097/EDE.0000000000001084>
- 405 [4]. Mccandless, L. C. , & Somers, J. M. . (2017). Bayesian sensitivity analysis for  
406 unmeasured confounding in causal mediation analysis. *Statistical Methods in Medical  
407 Research*, 962280217729844.
- 408 [5]. MacKinnon, D. P. (2000). Contrasts in multiple mediator models. *Multivariate  
409 applications in substance use research: New methods for new questions*, 141-160.
- 410 [6]. Avin, C., Shpitser, I., & Pearl, J. (2005). Identifiability of path-specific effects.
- 411 [7]. Imai, K., & Yamamoto, T. (2013). Identification and sensitivity analysis for multiple  
412 causal mechanisms: Revisiting evidence from framing experiments. *Political Analysis*,  
413 141-171.
- 414 [8]. Daniel, R. M., De Stavola, B. L., Cousens, S. N., & Vansteelandt, S. (2015). Causal  
415 mediation analysis with multiple mediators. *Biometrics*, 71(1), 1-14.

- 416 [9]. VanderWeele, T., & Vansteelandt, S. (2014). Mediation analysis with multiple mediators.  
417 *Epidemiologic methods*, 2(1), 95-115.
- 418 [10]. Tchetgen, E. J. T., & Shpitser, I. (2012). Semiparametric theory for causal mediation  
419 analysis: efficiency bounds, multiple robustness, and sensitivity analysis. *Annals of*  
420 *statistics*, 40(3), 1816.
- 421 [11]. Luo, P., & Geng, Z. (2016). Causal mediation analysis for survival outcome with  
422 unobserved mediator–outcome confounders. *Computational Statistics & Data Analysis*,  
423 93, 336-347.
- 424 [12]. VanderWeele, T. J., & Chiba, Y. (2014). Sensitivity analysis for direct and indirect  
425 effects in the presence of exposure-induced mediator-outcome confounders.  
426 *Epidemiology, biostatistics, and public health*, 11(2).
- 427 [13]. Miles, C. H., Shpitser, I., Kanki, P., Meloni, S., & Tchetgen Tchetgen, E. J. (2020).  
428 On semiparametric estimation of a path-specific effect in the presence of  
429 mediator-outcome confounding. *Biometrika*, 107(1), 159-172.
- 430 [14]. Smith, L. H., & VanderWeele, T. J. (2019). Mediation E-values: approximate  
431 sensitivity analysis for unmeasured mediator–outcome confounding. *Epidemiology*,  
432 30(6), 835-837.
- 433 [15]. Fulcher, I. R., Shi, X., & Tchetgen, E. J. T. (2019). Estimation of natural indirect effects robust  
434 to unmeasured confounding and mediator measurement error. *Epidemiology*, 30(6), 825-834.
- 435 [16]. Ding P, Vanderweele TJ. Sharp sensitivity bounds for mediation under unmeasured

- 436 mediator-outcome confounding. *Biometrika*. 2016;103(2):483-490.  
437 doi:10.1093/biomet/asw012
- 438 [17]. Burgess, S., Small, D. S., & Thompson, S. G. (2017). A review of instrumental  
439 variable estimators for Mendelian randomization. *Statistical methods in medical research*,  
440 26(5), 2333-2355.
- 441 [18]. Burgess, S., Butterworth, A., & Thompson, S. G. (2013). Mendelian randomization  
442 analysis with multiple genetic variants using summarized data. *Genetic epidemiology*,  
443 37(7), 658-665.
- 444 [19]. Tikkanen, E., Gustafsson, S., Knowles, J. W., Perez, M., Burgess, S., & Ingelsson, E.  
445 (2019). Body composition and atrial fibrillation: a Mendelian randomization study.  
446 *European heart journal*, 40(16), 1277-1282.
- 447 [20]. Burgess, S., & Thompson, S. G. (2015). Multivariable Mendelian randomization: the  
448 use of pleiotropic genetic variants to estimate causal effects. *American journal of*  
449 *epidemiology*, 181(4), 251-260.
- 450 [21]. Rees, J. M., Wood, A. M., & Burgess, S. (2017). Extending the MR-Egger method  
451 for multivariable Mendelian randomization to correct for both measured and unmeasured  
452 pleiotropy. *Statistics in medicine*, 36(29), 4705-4718.
- 453 [22]. Burgess, S., Thompson, D. J., Rees, J. M., Day, F. R., Perry, J. R., & Ong, K. K.  
454 (2017). Dissecting causal pathways using Mendelian randomization with summarized  
455 genetic data: application to age at menarche and risk of breast cancer. *Genetics*, 207(2),



456 481-487.

457 [23]. Bowden, J., Davey Smith, G., & Burgess, S. (2015). Mendelian randomization with  
458 invalid instruments: effect estimation and bias detection through Egger regression.  
459 *International journal of epidemiology*, 44(2), 512-525.

460 [24]. Taguri, M., Featherstone, J., & Cheng, J. (2018). Causal mediation analysis with  
461 multiple causally non-ordered mediators. *Statistical methods in medical research*, 27(1),  
462 3-19.

463 [25]. Angrist, J. D., & Krueger, A. B. (1995). Split-sample instrumental variables  
464 estimates of the return to schooling. *Journal of Business & Economic Statistics*, 13(2),  
465 225-235.

466 [26]. Martens, E. P., Pestman, W. R., de Boer, A., Belitser, S. V., & Klungel, O. H. (2006).  
467 Instrumental variables: application and limitations. *Epidemiology*, 260-267.

468 [27]. Staiger, D., & Stock, J. H. (1994). Instrumental variables regression with weak  
469 instruments (No. t0151). National Bureau of Economic Research.

470 [28]. Swanson, S. A., & VanderWeele, T. J. (2020). E-Values for Mendelian  
471 Randomization. *Epidemiology*, 31(3), e23-e24.

472 [29]. Lozano, R., Naghavi, M., Foreman, K., Lim, S., Shibuya, K., Aboyans, V., ... &  
473 AlMazroa, M. A. (2012). Global and regional mortality from 235 causes of death for 20  
474 age groups in 1990 and 2010: a systematic analysis for the Global Burden of Disease  
475 Study 2010. *The lancet*, 380(9859), 2095-2128.

- 476 [30]. Prospective Studies Collaboration. (2009). Body-mass index and cause-specific  
477 mortality in 900 000 adults: collaborative analyses of 57 prospective studies. *The Lancet*,  
478 373(9669), 1083-1096.
- 479 [31]. Van Gaal, L. F., Mertens, I. L., & Christophe, E. (2006). Mechanisms linking obesity  
480 with cardiovascular disease. *Nature*, 444(7121), 875-880.
- 481 [32]. Poirier, P., Giles, T. D., Bray, G. A., Hong, Y., Stern, J. S., Pi-Sunyer, F. X., & Eckel,  
482 R. H. (2006). Obesity and cardiovascular disease: pathophysiology, evaluation, and effect  
483 of weight loss: an update of the 1997 American Heart Association Scientific Statement  
484 on Obesity and Heart Disease from the Obesity Committee of the Council on Nutrition,  
485 Physical Activity, and Metabolism. *Circulation*, 113(6), 898-918.
- 486 [33]. Pulit, S. L., Stoneman, C., Morris, A. P., Wood, A. R., Glastonbury, C. A., Tyrrell,  
487 J., ... & Yang, J. (2019). Meta-analysis of genome-wide association studies for body fat  
488 distribution in 694 649 individuals of European ancestry. *Human molecular genetics*,  
489 28(1), 166-174.
- 490 [34]. Willer, C. J., Schmidt, E. M., Sengupta, S., Peloso, G. M., Gustafsson, S., Kanoni,  
491 S., ... & Beckmann, J. S. (2013). Discovery and refinement of loci associated with lipid  
492 levels. *Nature genetics*, 45(11), 1274.
- 493 [35]. Schunkert, H., König, I. R., Kathiresan, S., Reilly, M. P., Assimes, T. L., Holm, H., ...  
494 & Absher, D. (2011). Large-scale association analysis identifies 13 new susceptibility  
495 loci for coronary artery disease. *Nature genetics*, 43(4), 333-338.

- 496 [36]. Lusic, A. J., Attie, A. D., & Reue, K. (2008). Metabolic syndrome: from  
497 epidemiology to systems biology. *Nature Reviews Genetics*, 9(11), 819-830.
- 498 [37]. Lu, Y., Hajifathalian, K., Ezzati, M., Woodward, M., Rimm, E. B., & Danaei, G.  
499 (2013). Metabolic mediators of the effects of body-mass index, overweight, and obesity  
500 on coronary heart disease and stroke: a pooled analysis of 97 prospective cohorts with  
501 1·8 million participants. *Lancet (London, England)*, 383(9921), 970-983.
- 502 [38]. de Freitas, E. V., Brandão, A. A., Pozzan, R., Magalhães, M. E., Fonseca, F., Pizzi,  
503 O., ... & Brandão, A. P. (2011). Importance of high-density lipoprotein-cholesterol  
504 (HDL-C) levels to the incidence of cardiovascular disease (CVD) in the elderly. *Archives*  
505 *of gerontology and geriatrics*, 52(2), 217-222.
- 506 [39]. Tchetgen, E. J. T., & Shpitser, I. (2012). Semiparametric theory for causal mediation  
507 analysis: efficiency bounds, multiple robustness, and sensitivity analysis. *Annals of*  
508 *statistics*, 40(3), 1816.
- 509 [40]. Labrecque, J. A., & Swanson, S. A. (2020). Commentary: Mendelian randomization  
510 with multiple exposures: the importance of thinking about time. *International journal of*  
511 *epidemiology*, 49(4), 1158-1162.
- 512 [41]. Didelez, V., & Sheehan, N. (2007). Mendelian randomization as an instrumental  
513 variable approach to causal inference. *Statistical methods in medical research*, 16(4),  
514 309-330.
- 515 [42]. Burgess, S., & Thompson, S. G. (2017). Interpreting findings from Mendelian

- 516 randomization using the MR-Egger method. *European journal of epidemiology*, 32(5),  
517 377-389.
- 518 [43]. Labrecque, J. A., & Swanson, S. A. (2020). Commentary: Mendelian randomization  
519 with multiple exposures: the importance of thinking about time. *International journal of*  
520 *epidemiology*, 49(4), 1158-1162.
- 521 [44]. VanderWeele, T. J., Vansteelandt, S., & Robins, J. M. (2014). Effect decomposition  
522 in the presence of an exposure-induced mediator-outcome confounder. *Epidemiology*  
523 (Cambridge, Mass.), 25(2), 300.
- 524 [45]. Mittinty, M. N., Lynch, J. W., Forbes, A. B., & Gurrin, L. C. (2019). Effect  
525 decomposition through multiple causally nonordered mediators in the presence of  
526 exposure - induced mediator - outcome confounding. *Statistics in medicine*, 38(26),  
527 5085-5102.
- 528 [46]. VanderWeele, T. J., & Vansteelandt, S. (2009). Conceptual issues concerning  
529 mediation, interventions and composition. *Statistics and its Interface*, 2(4), 457-468.
- 530 [47]. Loh, W. W., Moerkerke, B., Loeys, T., & Vansteelandt, S. (2020). Non-linear  
531 mediation analysis with high-dimensional mediators whose causal structure is unknown.  
532 arXiv preprint arXiv:2001.07147..
- 533 [48]. Valeri, L., & VanderWeele, T. J. (2013). Mediation analysis allowing for  
534 exposure–mediator interactions and causal interpretation: theoretical assumptions and  
535 implementation with SAS and SPSS macros. *Psychological methods*, 18(2), 137.

- 536 [49]. VanderWeele, T. J. (2014). A unification of mediation and interaction: a four-way  
537 decomposition. *Epidemiology (Cambridge, Mass.)*, 25(5), 749.
- 538 [50]. VanderWeele, T. J., & Tchetgen, E. J. T. (2017). Mediation analysis with time  
539 varying exposures and mediators. *Journal of the Royal Statistical Society. Series B,*  
540 *Statistical Methodology*, 79(3), 917.
- 541 [51]. Tchetgen, E. J. T., & VanderWeele, T. J. (2014). On identification of natural direct  
542 effects when a confounder of the mediator is directly affected by exposure. *Epidemiology*  
543 *(Cambridge, Mass.)*, 25(2), 282.
- 544 [52]. Vansteelandt, S., Linder, M., Vandenberghe, S., Steen, J., & Madsen, J. (2019).  
545 Mediation analysis of time-to-event endpoints accounting for repeatedly measured  
546 mediators subject to time-varying confounding. *Statistics in medicine*, 38(24),  
547 4828-4840.
- 548 [53]. Zheng, W., & van der Laan, M. (2017). Longitudinal mediation analysis with  
549 time-varying mediators and exposures, with application to survival outcomes. *Journal of*  
550 *causal inference*, 5(2).
- 551

**Table 1.** Causal effect of each pathway between BMI and CVD

|                | IVW                |       | MR-Egger           |       |
|----------------|--------------------|-------|--------------------|-------|
|                | OR[95% CI]         | Power | OR[95% CI]         | Power |
| Total effect   | 1.216[1.034,1.431] | 1     | 1.772[1.208,2.600] | 1     |
| Direct effect  | 1.013[0.850,1.208] | -     | 1.391[0.945,2.048] | -     |
| BMI→HDL→CVD    | 1.054[1.034,1.101] | 0.97  | 1.097[1.040,1.125] | 1     |
| BMI→TG→CVD     | 1.050[1.033,1.096] | 0.97  | 1.068[1.027,1.137] | 1     |
| BMI→TG→HDL→CVD | 1.047[1.005,1.101] | 0.7   | 1.052[1.000,1.125] | 0.8   |

BMI: body mass index; CVD: cardiovascular disease; TG: triacylglycerols; HDL: high density lipoprotein; LDL: low density lipoprotein.

**Table 2.** Simulation of PSE-IVW with two non-ordered mediators in standard MR

| True |      |      |      |      | Estimates |       |       |       |       |       | MSE  |      |      |      |      |      | Power/Type I error |      |      |      |      |      |
|------|------|------|------|------|-----------|-------|-------|-------|-------|-------|------|------|------|------|------|------|--------------------|------|------|------|------|------|
| TE   | DE   | IE   | IE1  | IE2  | TE        | DE    | IE_d  | IE_p  | IE1   | IE2   | TE   | DE   | IE_d | IE_p | IE1  | IE2  | TE                 | DE   | IE_d | IE_p | IE1  | IE2  |
| 1.6  | 0.8  | 0.8  | 0.5  | 0.3  | 1.61      | 0.75  | 0.85  | 0.85  | 0.53  | 0.32  | 0.00 | 0.00 | 0.01 | 0.01 | 0.00 | 0.00 | 1.00               | 1.00 | 1.00 | 1.00 | 1.00 | 1.00 |
| 0.6  | 0.8  | -0.2 | -0.5 | 0.3  | 0.60      | 0.75  | -0.15 | -0.15 | -0.47 | 0.32  | 0.00 | 0.00 | 0.01 | 0.01 | 0.00 | 0.00 | 1.00               | 1.00 | 0.26 | 0.29 | 1.00 | 1.00 |
| 0.7  | 0.5  | 0.2  | 0.5  | -0.3 | 0.70      | 0.45  | 0.25  | 0.25  | 0.54  | -0.29 | 0.00 | 0.00 | 0.01 | 0.01 | 0.00 | 0.00 | 1.00               | 1.00 | 0.74 | 0.75 | 1.00 | 1.00 |
| -0.3 | 0.5  | -0.8 | -0.5 | -0.3 | -0.30     | 0.46  | -0.76 | -0.76 | -0.47 | -0.28 | 0.00 | 0.00 | 0.01 | 0.01 | 0.00 | 0.00 | 1.00               | 1.00 | 1.00 | 1.00 | 1.00 | 1.00 |
| 0    | -0.8 | 0.8  | 0.5  | 0.3  | 0.01      | -0.84 | 0.85  | 0.85  | 0.53  | 0.32  | 0.01 | 0.00 | 0.01 | 0.01 | 0.00 | 0.00 | 0.07               | 1.00 | 1.00 | 1.00 | 1.00 | 1.00 |
| -1.6 | -0.8 | -0.8 | -0.5 | -0.3 | -1.60     | -0.85 | -0.76 | -0.76 | -0.47 | -0.29 | 0.00 | 0.00 | 0.01 | 0.01 | 0.00 | 0.00 | 1.00               | 1.00 | 1.00 | 1.00 | 1.00 | 1.00 |
| 0.8  | 0    | 0.8  | 0.5  | 0.3  | 0.81      | -0.04 | 0.85  | 0.85  | 0.53  | 0.32  | 0.00 | 0.00 | 0.01 | 0.01 | 0.00 | 0.00 | 1.00               | 0.00 | 1.00 | 1.00 | 1.00 | 1.00 |
| 1.3  | 0.8  | 0.5  | 0.5  | 0    | 1.31      | 0.75  | 0.55  | 0.55  | 0.54  | 0.02  | 0.00 | 0.00 | 0.01 | 0.01 | 0.00 | 0.00 | 1.00               | 1.00 | 1.00 | 1.00 | 1.00 | 1.00 |
| 1.3  | 0.8  | 0.5  | 0.5  | 0    | 1.31      | 0.77  | 0.54  | 0.54  | 0.54  | 0.00  | 0.00 | 0.00 | 0.01 | 0.01 | 0.00 | 0.00 | 1.00               | 1.00 | 1.00 | 1.00 | 1.00 | 0.07 |
| 0.8  | 0.8  | 0    | 0    | 0    | 0.80      | 0.75  | 0.05  | 0.05  | 0.03  | 0.02  | 0.00 | 0.00 | 0.00 | 0.00 | 0.00 | 0.00 | 1.00               | 1.00 | 0.01 | 0.02 | 0.00 | 0.01 |

TE: total effect; DE: direct effect; IE: indirect effect; IE1:  $X \rightarrow M_1 \rightarrow Y$ ; IE2:  $X \rightarrow M_2 \rightarrow Y$ ; IE\_d: indirect effect calculated by difference method; IE\_p: indirect effect calculated by product method.

**Table 3.** Simulation of PSE-IVW with two ordered mediators in standard MR

| True |      |      |      |      |      | Estimates |       |       |       |       |       | MSE   |      |      |      |      |      | Power/Type I error |      |      |      |      |      |      |      |      |
|------|------|------|------|------|------|-----------|-------|-------|-------|-------|-------|-------|------|------|------|------|------|--------------------|------|------|------|------|------|------|------|------|
| TE   | DE   | IE   | IE1  | IE2  | IE3  | TE        | DE    | IE_d  | IE_p  | IE1   | IE2   | IE3   | TE   | DE   | IE_d | IE_p | IE1  | IE2                | IE3  | TE   | DE   | IE_d | IE_p | IE1  | IE2  | IE3  |
| 1.8  | 0.8  | 1    | 0.5  | 0.3  | 0.2  | 1.81      | 0.75  | 1.06  | 1.06  | 0.52  | 0.28  | 0.25  | 0.01 | 0.00 | 0.01 | 0.01 | 0.00 | 0.02               | 0.02 | 1.00 | 1.00 | 1.00 | 1.00 | 0.97 | 0.64 | 0.62 |
| 0.8  | 0.8  | 0    | -0.5 | 0.3  | 0.2  | 0.81      | 0.75  | 0.05  | 0.05  | -0.48 | 0.29  | 0.24  | 0.00 | 0.00 | 0.01 | 0.01 | 0.00 | 0.02               | 0.02 | 1.00 | 1.00 | 1.00 | 1.00 | 1.00 | 0.70 | 0.60 |
| 1.2  | 0.8  | 0.4  | 0.5  | -0.3 | 0.2  | 1.20      | 0.75  | 0.45  | 0.45  | 0.54  | -0.26 | 0.16  | 0.01 | 0.00 | 0.01 | 0.01 | 0.01 | 0.01               | 0.01 | 1.00 | 1.00 | 0.98 | 0.72 | 1.00 | 0.69 | 0.41 |
| 0.2  | 0.8  | -0.6 | -0.5 | -0.3 | 0.2  | 0.20      | 0.76  | -0.56 | -0.56 | -0.46 | -0.25 | 0.16  | 0.00 | 0.00 | 0.01 | 0.01 | 0.00 | 0.01               | 0.01 | 0.97 | 1.00 | 1.00 | 1.00 | 1.00 | 0.68 | 0.38 |
| 0.2  | -0.8 | 1    | 0.5  | 0.3  | 0.2  | 0.21      | -0.84 | 1.05  | 1.06  | 0.52  | 0.29  | 0.25  | 0.01 | 0.00 | 0.01 | 0.01 | 0.00 | 0.02               | 0.02 | 0.71 | 1.00 | 1.00 | 1.00 | 1.00 | 0.67 | 0.62 |
| -1.8 | -0.8 | -1   | -0.5 | -0.3 | -0.2 | -1.80     | -0.85 | -0.96 | -0.96 | -0.48 | -0.25 | -0.23 | 0.01 | 0.00 | 0.01 | 0.01 | 0.00 | 0.02               | 0.01 | 1.00 | 1.00 | 1.00 | 1.00 | 1.00 | 0.66 | 0.64 |
| 1    | 0    | 1    | 0.5  | 0.3  | 0.2  | 1.01      | -0.05 | 1.05  | 1.05  | 0.52  | 0.29  | 0.25  | 0.01 | 0.00 | 0.01 | 0.01 | 0.00 | 0.02               | 0.02 | 1.00 | 0.99 | 1.00 | 1.00 | 0.99 | 0.67 | 0.61 |
| 1.3  | 0.8  | 0.5  | 0    | 0.3  | 0.2  | 1.31      | 0.75  | 0.56  | 0.56  | 0.02  | 0.29  | 0.25  | 0.00 | 0.00 | 0.01 | 0.01 | 0.00 | 0.02               | 0.02 | 1.00 | 1.00 | 1.00 | 0.89 | 0.00 | 0.67 | 0.62 |
| 1.5  | 0.8  | 0.7  | 0.5  | 0    | 0.2  | 1.51      | 0.77  | 0.74  | 0.74  | 0.52  | -0.03 | 0.25  | 0.01 | 0.00 | 0.01 | 0.01 | 0.00 | 0.02               | 0.02 | 1.00 | 1.00 | 1.00 | 0.97 | 0.99 | 0.07 | 0.61 |
| 1    | 0.8  | 0.2  | 0    | 0    | 0.2  | 1.01      | 0.77  | 0.24  | 0.24  | 0.02  | -0.03 | 0.25  | 0.00 | 0.00 | 0.01 | 0.01 | 0.00 | 0.02               | 0.02 | 1.00 | 1.00 | 0.41 | 0.01 | 0.00 | 0.08 | 0.61 |
| 0    | -1   | 1    | 0.5  | 0.3  | 0.2  | 0.01      | -1.05 | 1.06  | 1.06  | 0.52  | 0.29  | 0.25  | 0.01 | 0.00 | 0.01 | 0.01 | 0.00 | 0.02               | 0.02 | 0.05 | 1.00 | 1.00 | 1.00 | 1.00 | 0.69 | 0.62 |

TE: total effect; DE: direct effect; IE: indirect effect; IE1:  $X \rightarrow M_1 \rightarrow Y$ ; IE2:  $X \rightarrow M_2 \rightarrow Y$ ; IE3:  $X \rightarrow M_1 \rightarrow M_2 \rightarrow Y$ ; IE\_d: indirect effect calculated by difference method; IE\_p: indirect effect calculated by product method.

medRxiv preprint doi: <https://doi.org/10.1101/2021.07.22.497151>; this version posted January 8, 2021. The copyright holder for this preprint (which was not certified by peer review) is the author/funder, who has granted medRxiv a license to display the preprint in perpetuity. It is made available under aCC-BY-NC-ND 4.0 International license.



**Table 4.** Comparison of the assumption in PSE-MR and typical causal mediation analysis

| Methods   | PSE-MR                                                                                                                                 | Typical causal mediation analysis                                                                                | Solution for violating assumptions |
|-----------|----------------------------------------------------------------------------------------------------------------------------------------|------------------------------------------------------------------------------------------------------------------|------------------------------------|
| Common    | (1) Consistency assumption: $M(x)=M$ and $Y(x)=Y$ if $X=x$ ; $Y(x,m)=Y$ if $X=x, M=m$ .                                                |                                                                                                                  |                                    |
|           | (2) Composition assumption: $Y(x)=Y(x,M(x))$ if $X=x$ .                                                                                |                                                                                                                  |                                    |
|           | (3) A cross-world independence assumption: $Y(x,m) \perp M(x^*)   C$ for all $(x, x^*, m)$ .                                           |                                                                                                                  | [10] [44] [45] [49]                |
|           | (4) There is no additive interaction of the exposure and the mediators on the outcome ( $Y$ ).                                         |                                                                                                                  | [10] [46] [48] [49]                |
|           | (5) Linearity.                                                                                                                         |                                                                                                                  | [10] [47]                          |
| Different | (1) The IV $G_j$ is associated with the exposure $X$ but independent of all the unmeasured confounders.                                | (1) No-unmeasured confounders of the $X$ - $Y$ relation, that is, $Y(x,m) \perp X   C$ for all $(x,m)$ .         | [10] [15]                          |
|           | (2) The Exclusion restriction assumption or the InSIDE assumption.                                                                     | (2) No-unmeasured confounders of the $M$ - $Y$ relation, that is, $Y(x,m) \perp M(x)   X=x, C$ for all $(x,m)$ . | [10] [11] [13] [14] [15][16]       |
|           | (3) There is no additive interaction of the exposure or the mediators and confounders on the mediator ( $M$ ) and the outcome ( $Y$ ). | (3) No-unmeasured confounders of the $X$ - $M$ relation, that is, $M(x) \perp X   C$ for all $x$ .               | [10] [15]                          |
|           | (4) Data for exposure, mediators and outcome can from different datasets with homogeneous population.                                  | (4) Data for exposure, mediators and outcome must from the same dataset.                                         |                                    |
|           |                                                                                                                                        | (5) Exposure, mediators and confounders not vary with time.                                                      | [51] [52] [53]                     |

medRxiv preprint doi: <https://doi.org/10.1101/2021.01.07.21249415>; this version posted January 8, 2021. The copyright holder for this preprint (which was not certified by peer review) is the author/funder, who has granted medRxiv a license to display the preprint in perpetuity. It is made available under a CC-BY-NC-ND 4.0 International license.

## Figure legends

**Figure 1.** Three types of settings with two mediators,  $M_1$  and  $M_2$  are shown in (A) where  $M_1$  is independent of  $M_2$ ; (B) where  $M_1$  is related to  $M_2$ , but not causally; and (C) where  $M_1$  is causally related to  $M_2$  (causally-ordered mediators). Graphical diagrams for PSE-MR are given in settings with one mediator (D), two non-ordered mediators (E), and two ordered mediators (F).  $X$ : the exposure,  $M_1$  and  $M_2$ : two mediators,  $Y$ : outcome,  $G$ : instrumental variables (genetic variants).

**Figure 2.** Graphical diagrams of relationships between the exposure ( $X$ ), causally non-ordered mediators ( $M_1, \dots, M_n$ ), outcome ( $Y$ ), and instrumental variables ( $G$ ), which omits the confounders among  $X$ ,  $M$  and  $Y$ , are shown as analyzed with (A) PSE-IVW and (B) PSE-Egger. Graphical diagrams of relationships between exposure ( $X$ ), causally ordered mediators ( $M_1, \dots, M_n$ ), outcome ( $Y$ ), and instrumental variables ( $G$ ), which omits the confounders ( $U$ ) among  $X$ ,  $M_1, \dots, M_n$  and  $Y$  are shown, as analyzed with (C) PSE-IVW and (D) PSE-Egger.

**Figure 3.** Funnel plots before (A-D) and after (E-H) removing outliers.

**Figure 4.** Diagrams of the causal pathway from BMI to CVD. BMI, body mass index; CVD, cardiovascular disease; TG, triacylglycerol; HDL, high-density lipoprotein.

## Supplementary Digital Content

**S1 Appendix.** Supplemental methods.

**S2 Appendix.** Supplemental simulations.

medRxiv preprint doi: <https://doi.org/10.1101/2021.01.07.21249415>; this version posted January 8, 2021. The copyright holder for this preprint (which was not certified by peer review) is the author/funder, who has granted medRxiv a license to display the preprint in perpetuity. It is made available under a [CC-BY-NC-ND 4.0 International license](#) .

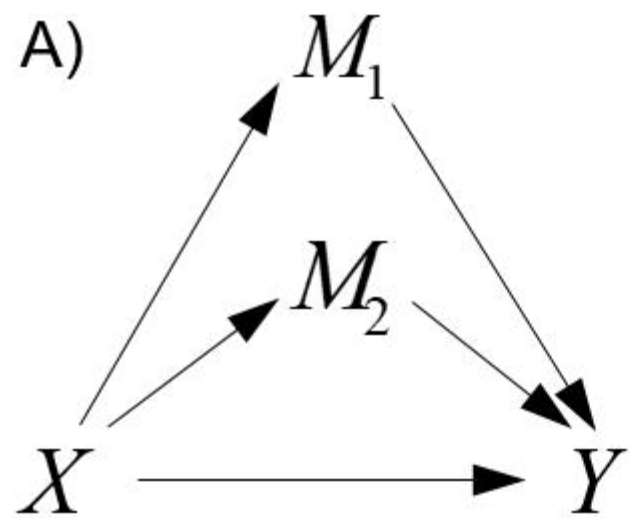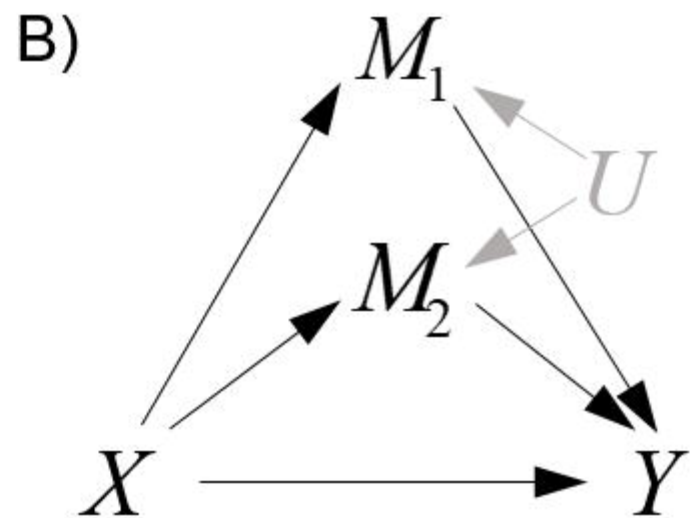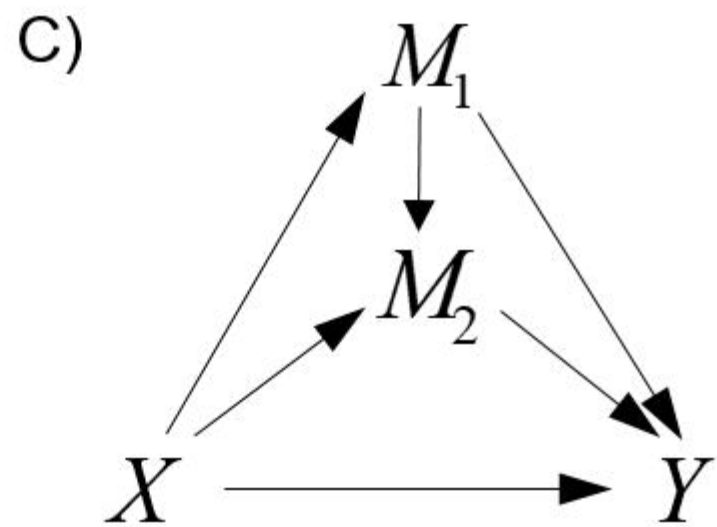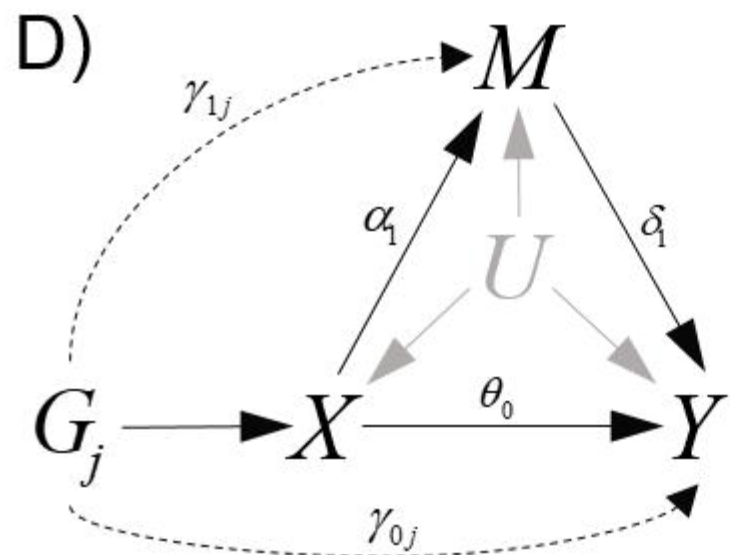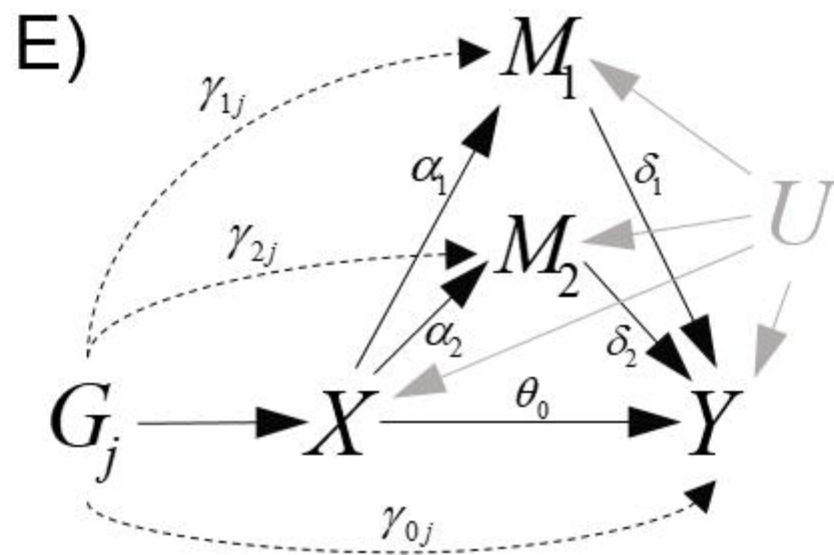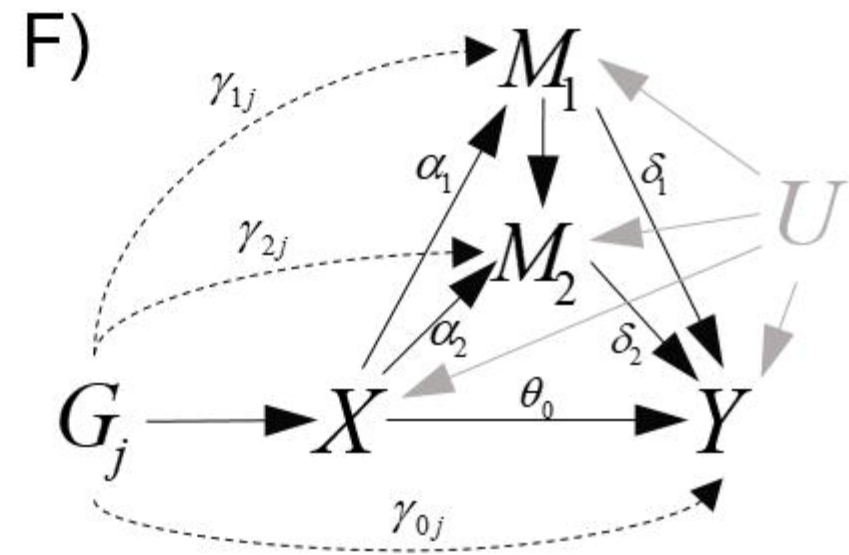

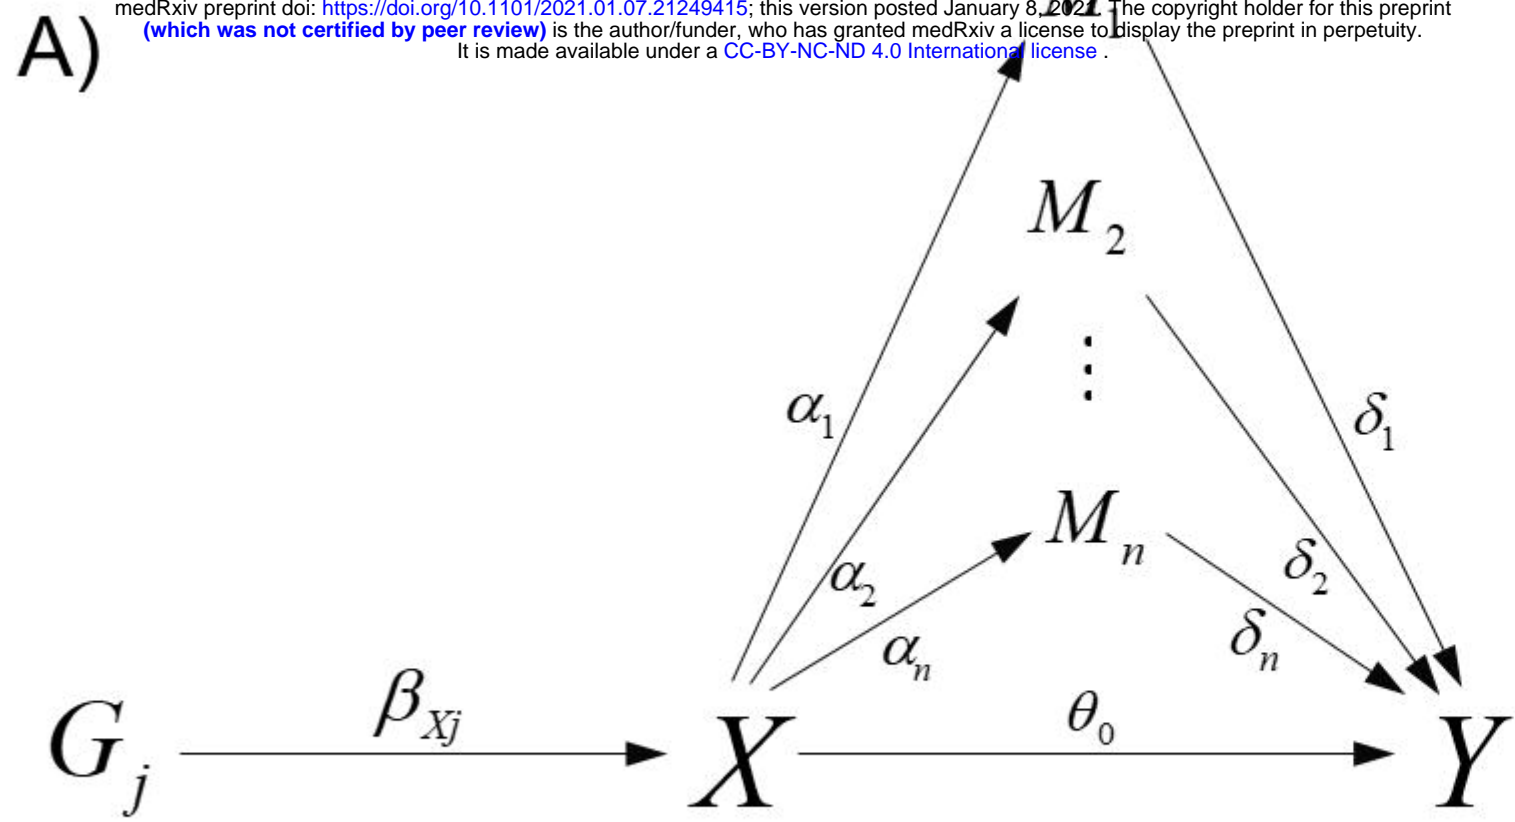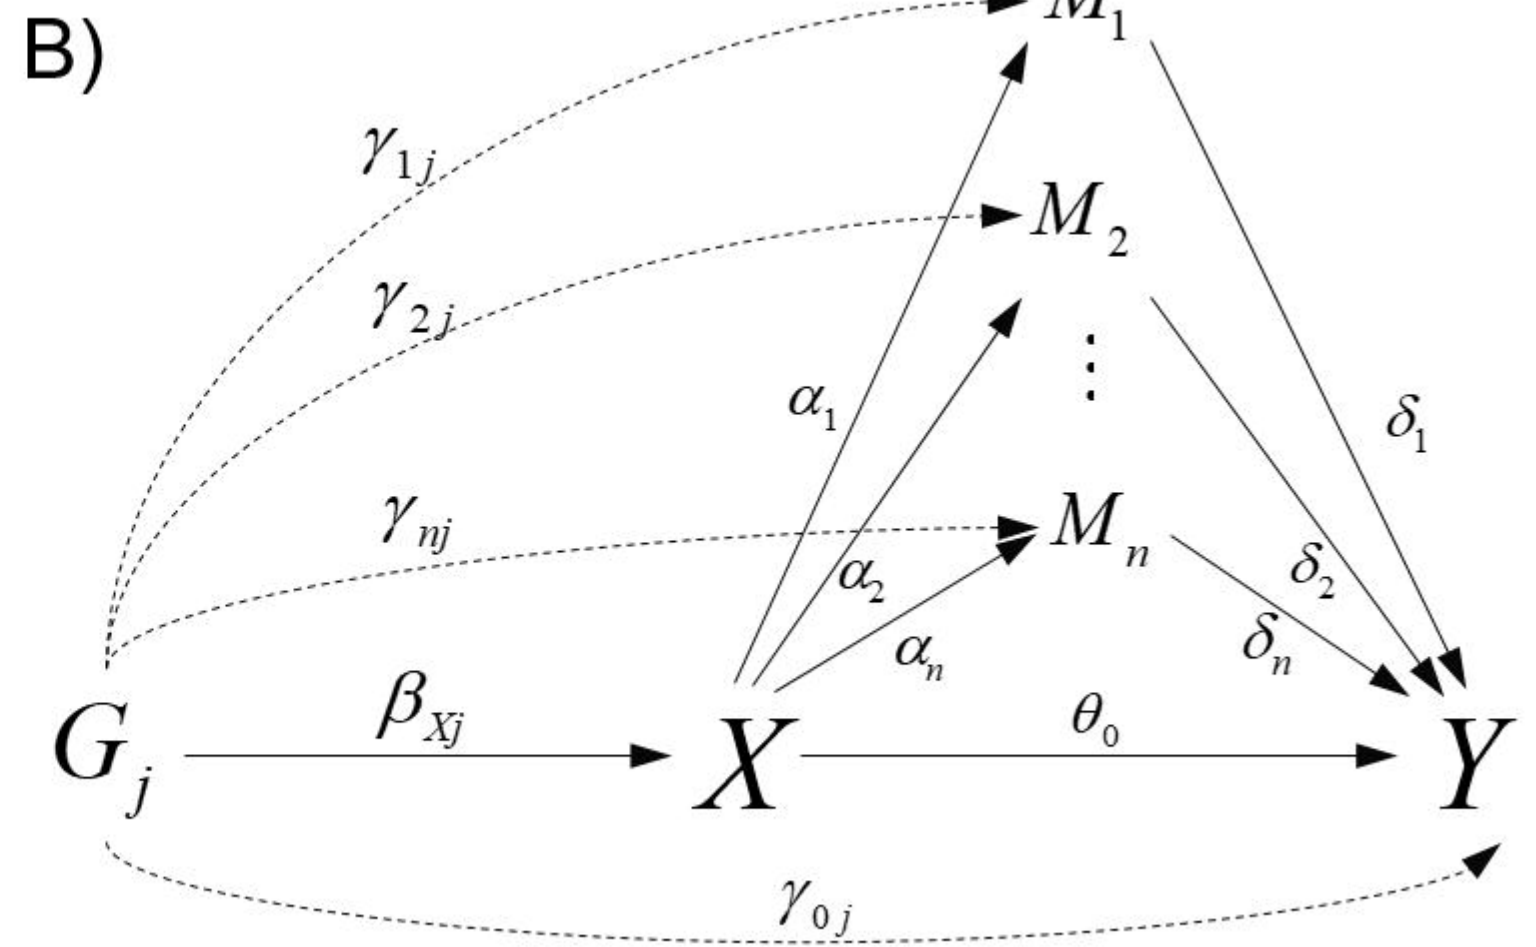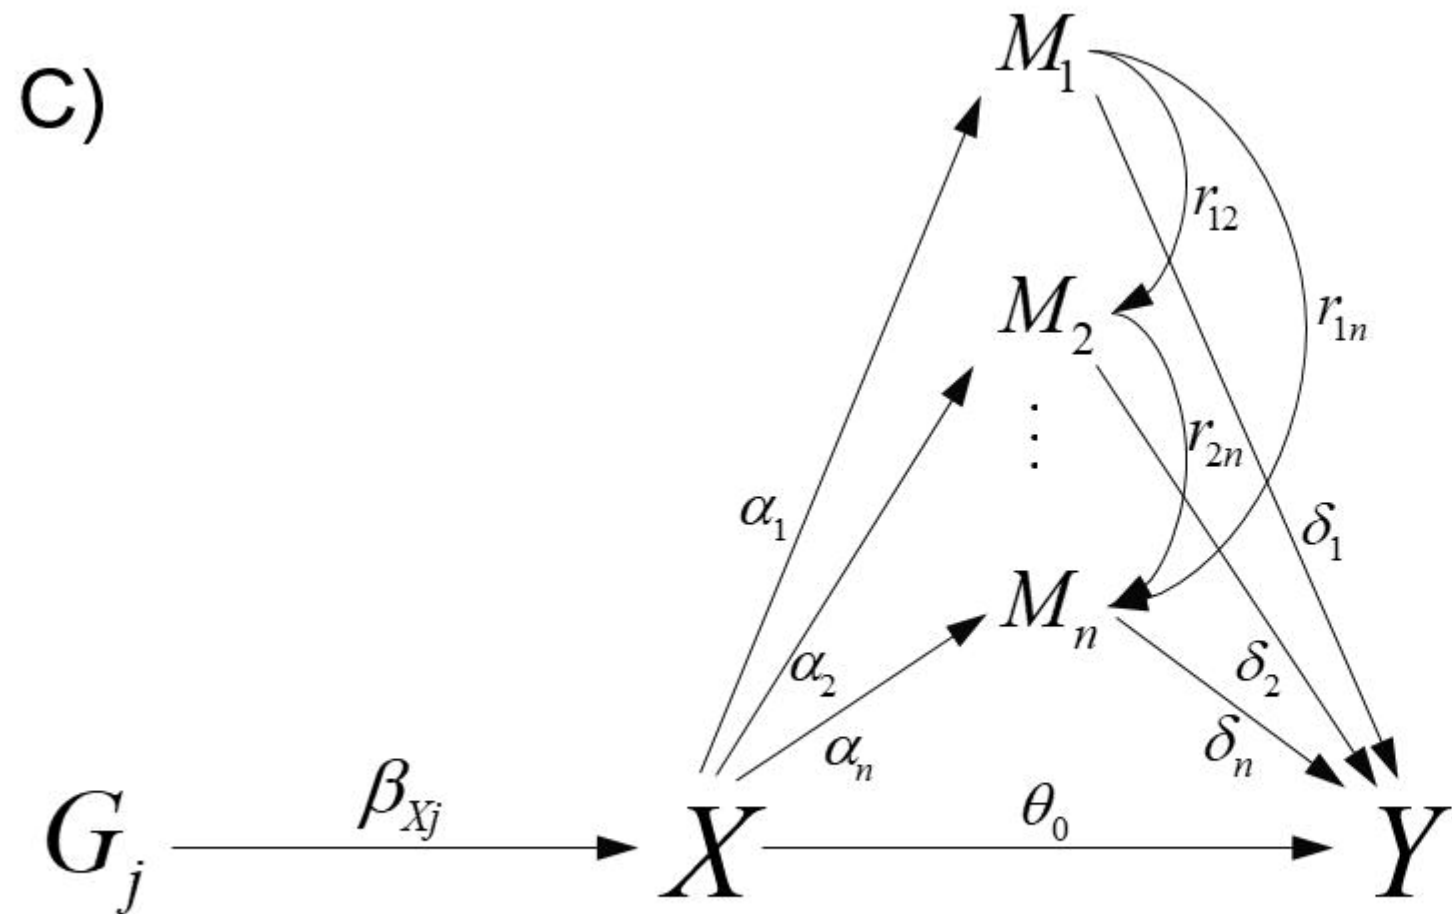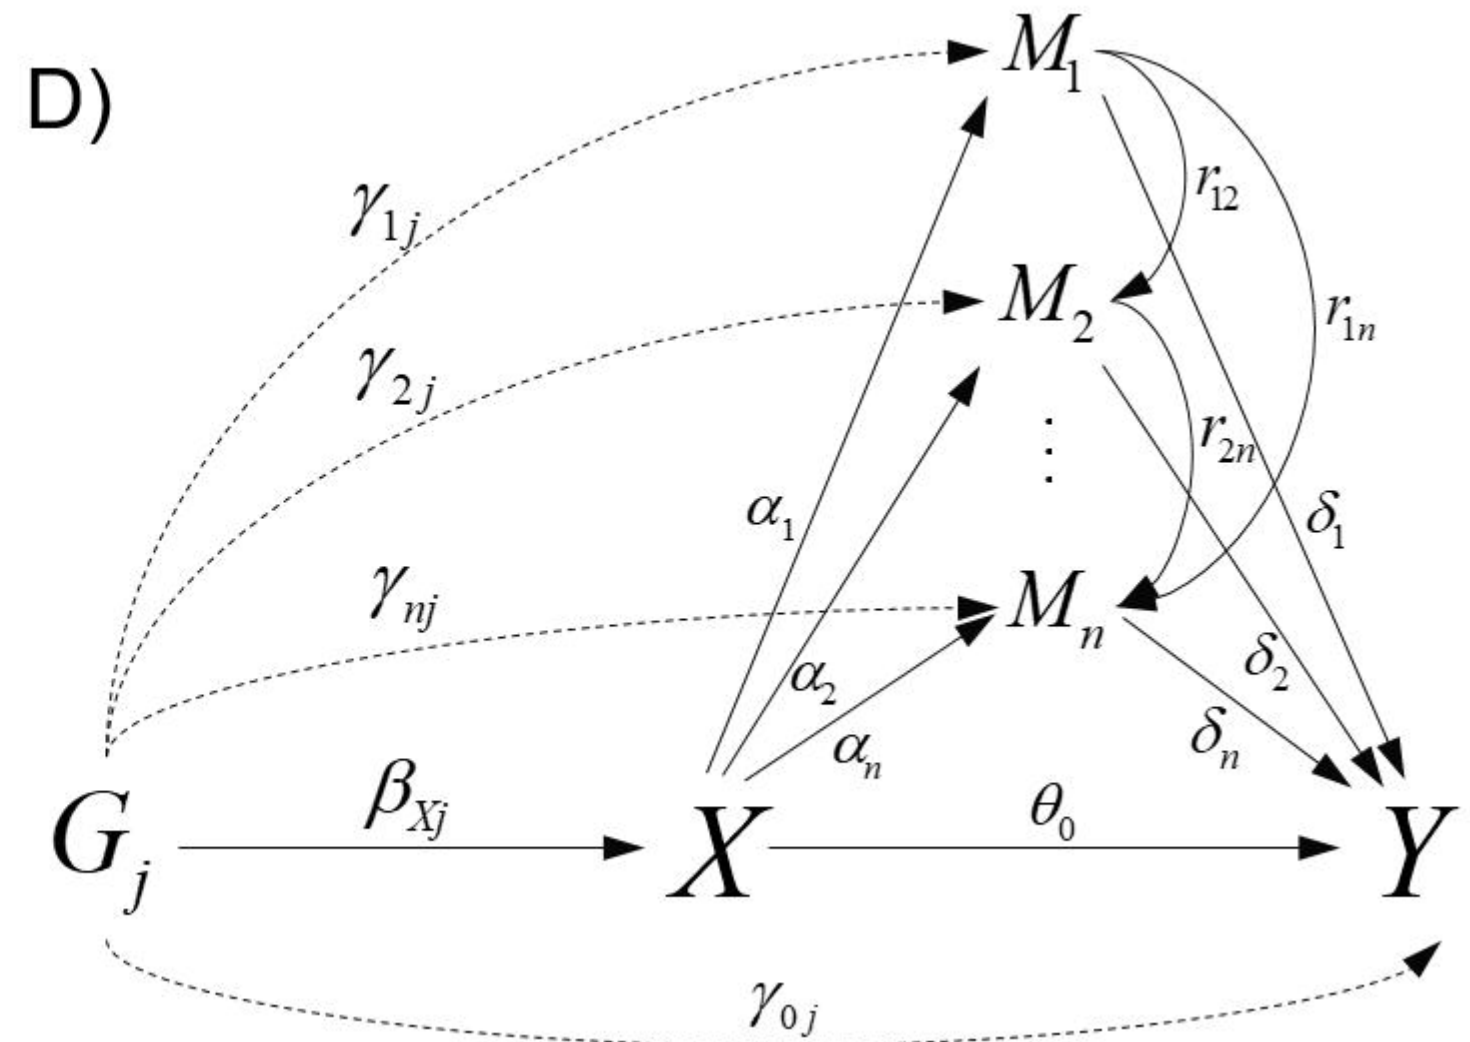



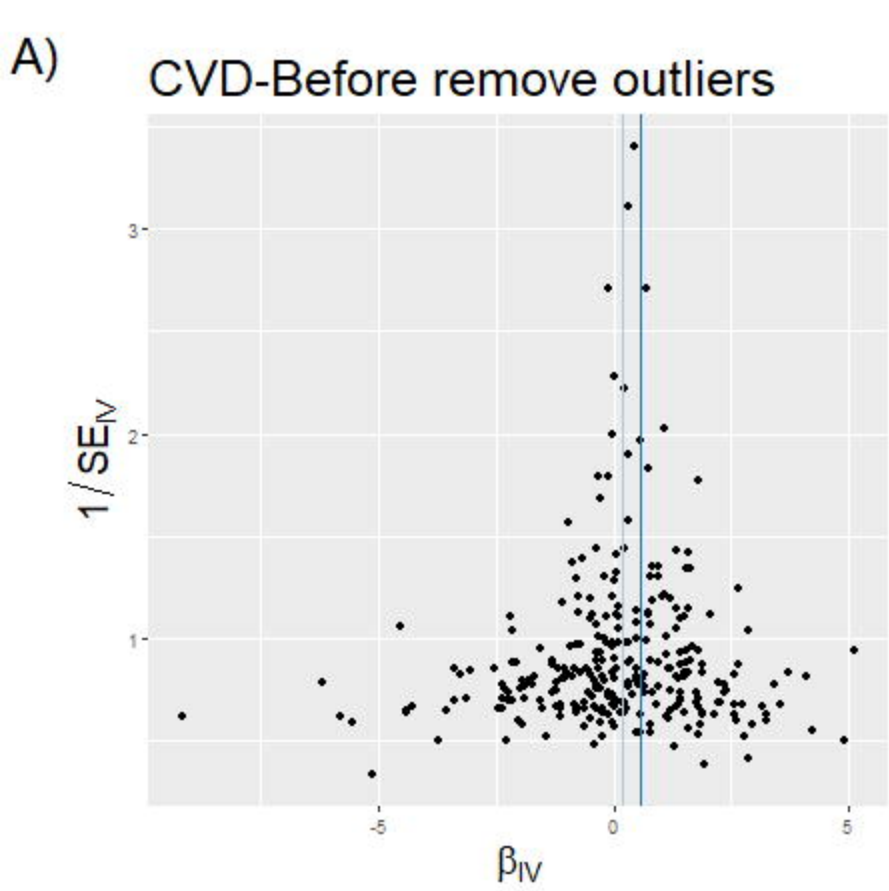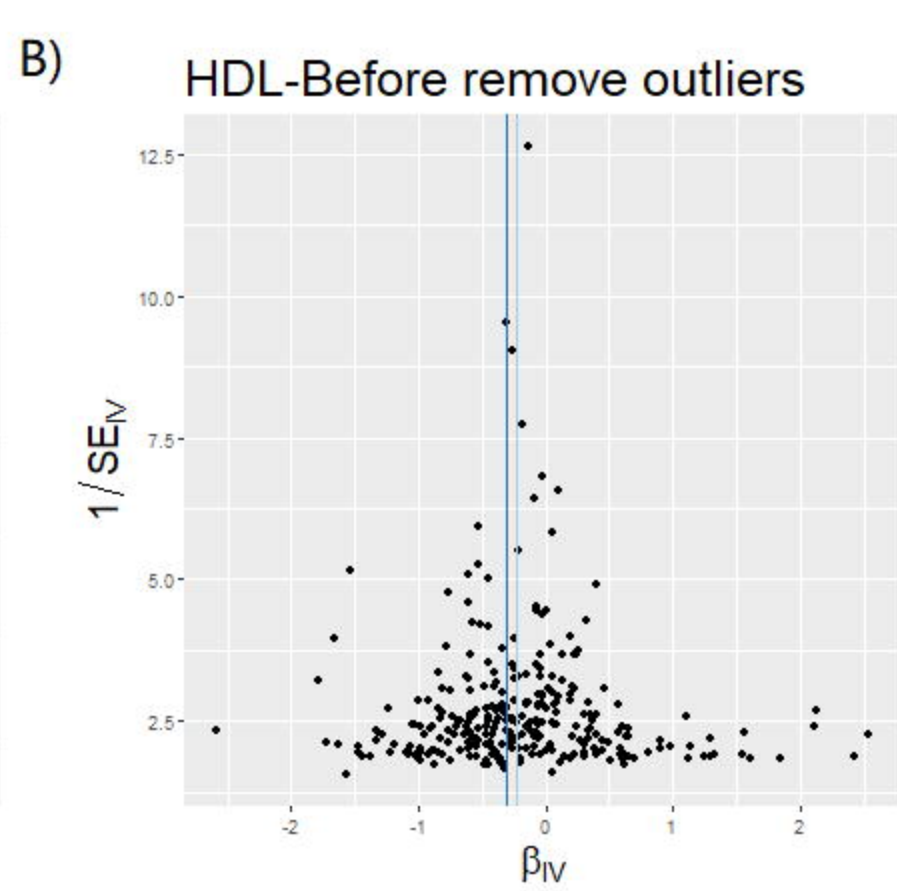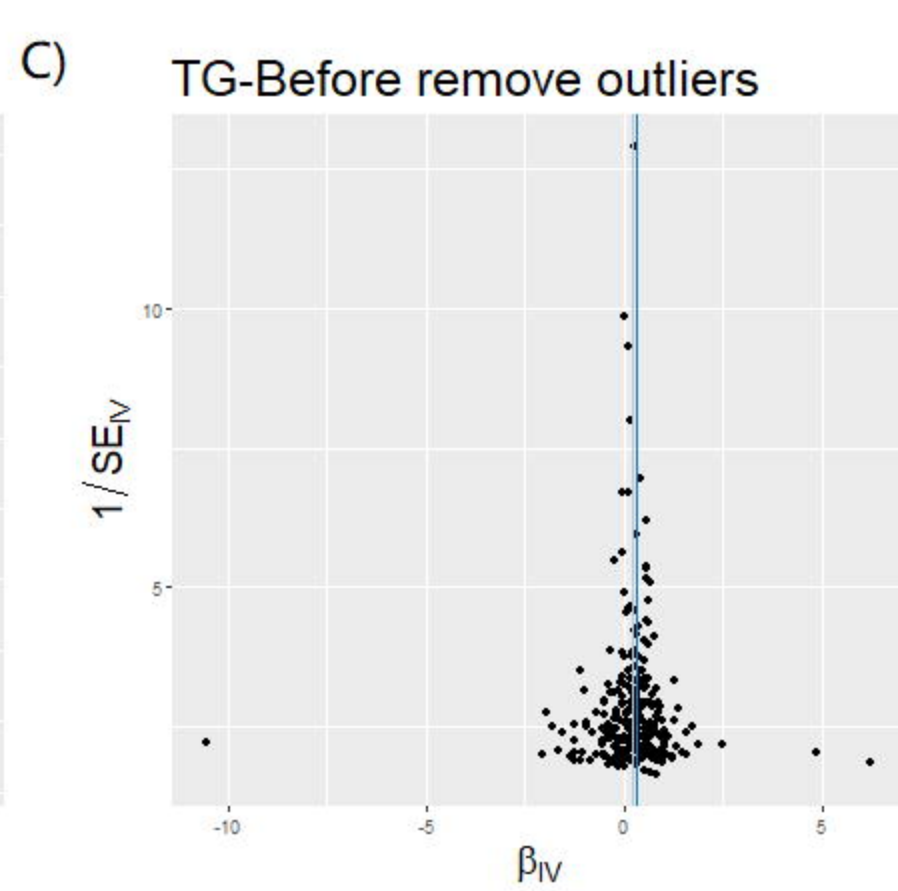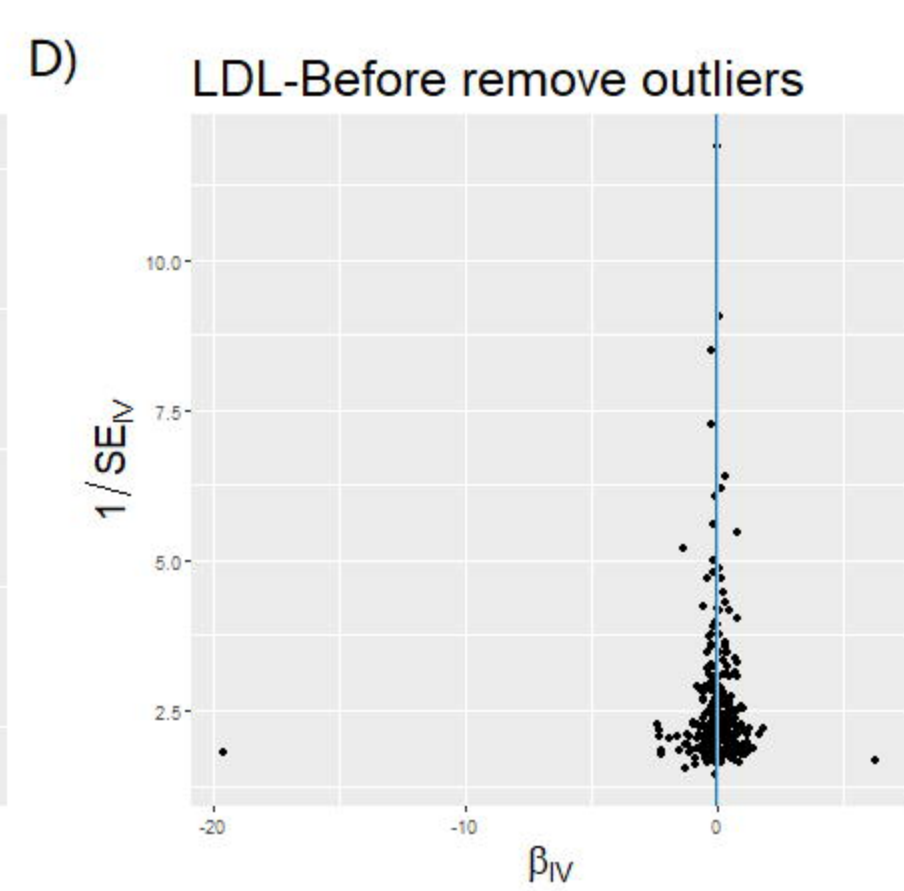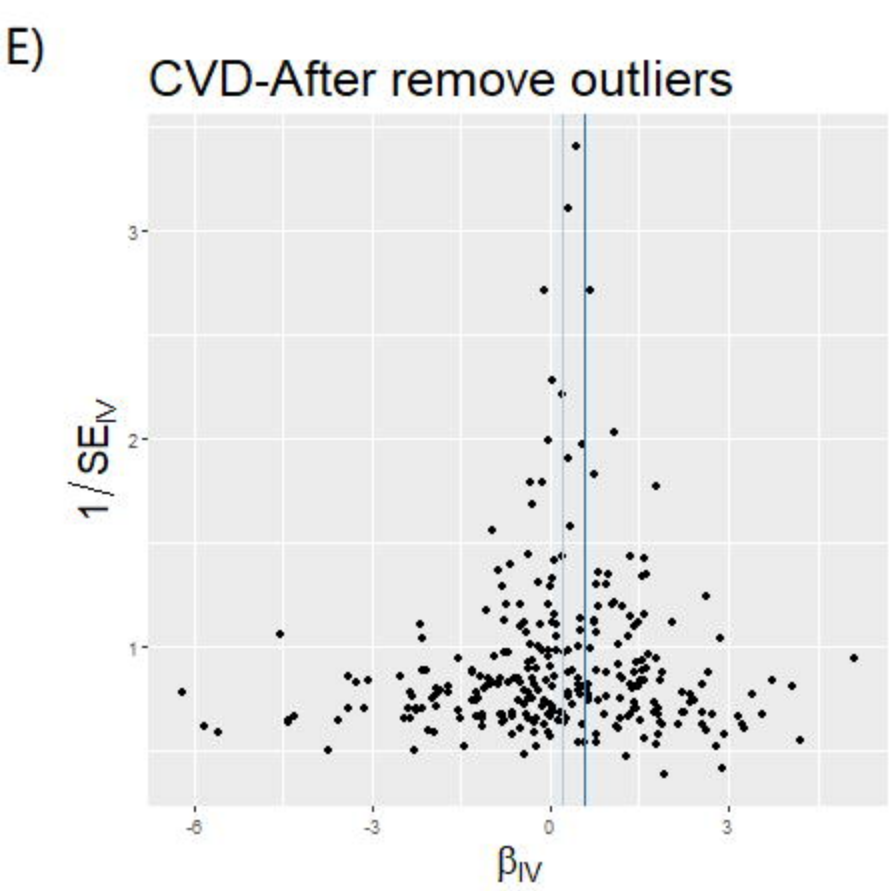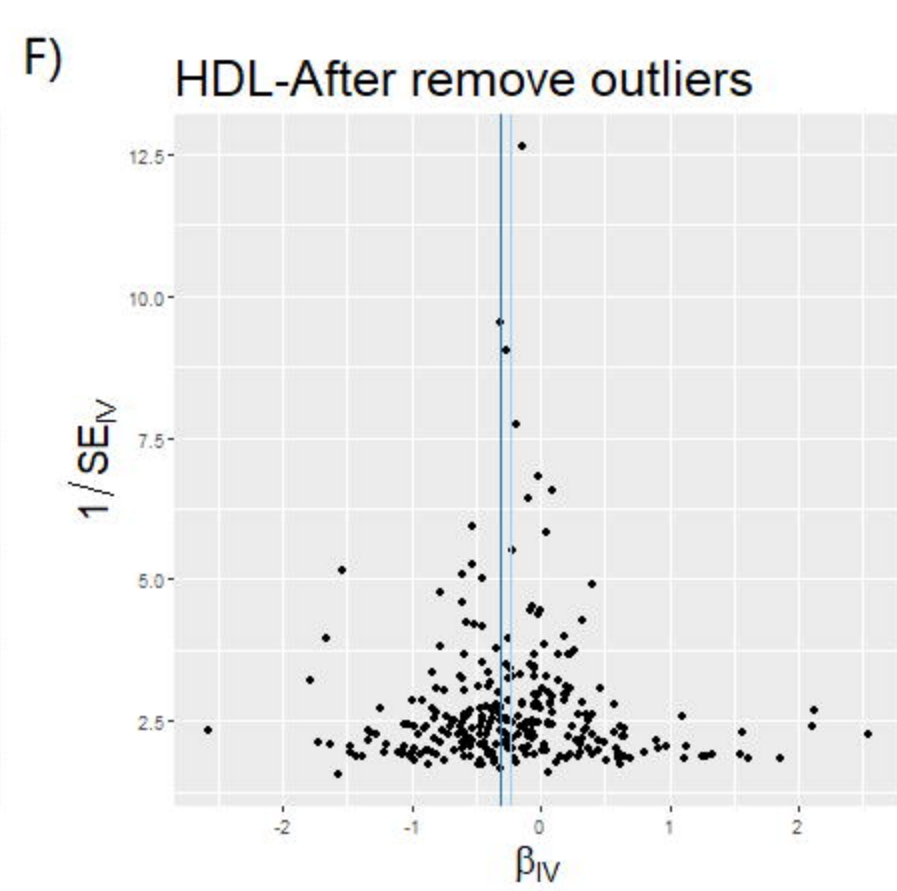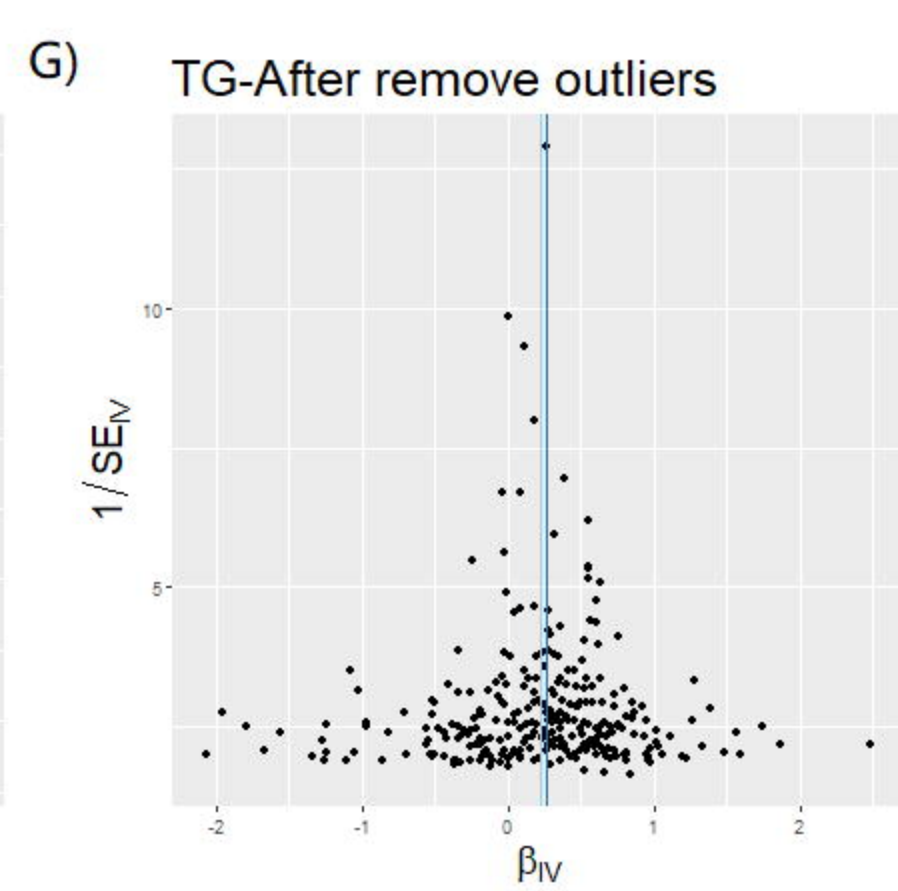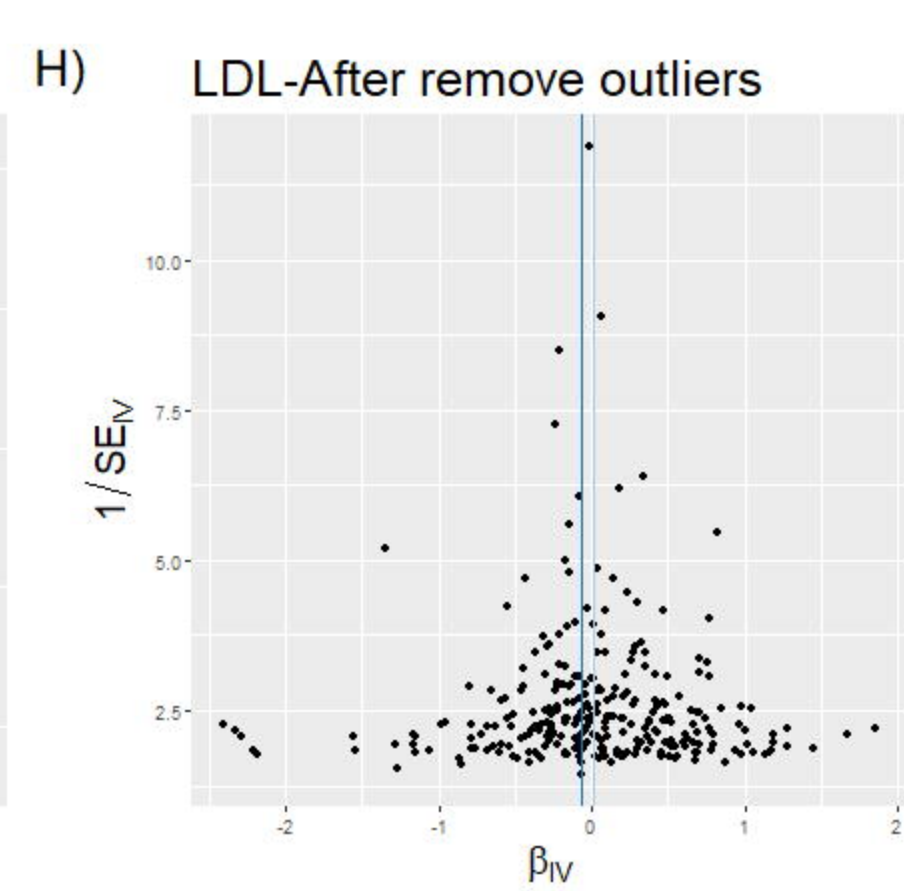

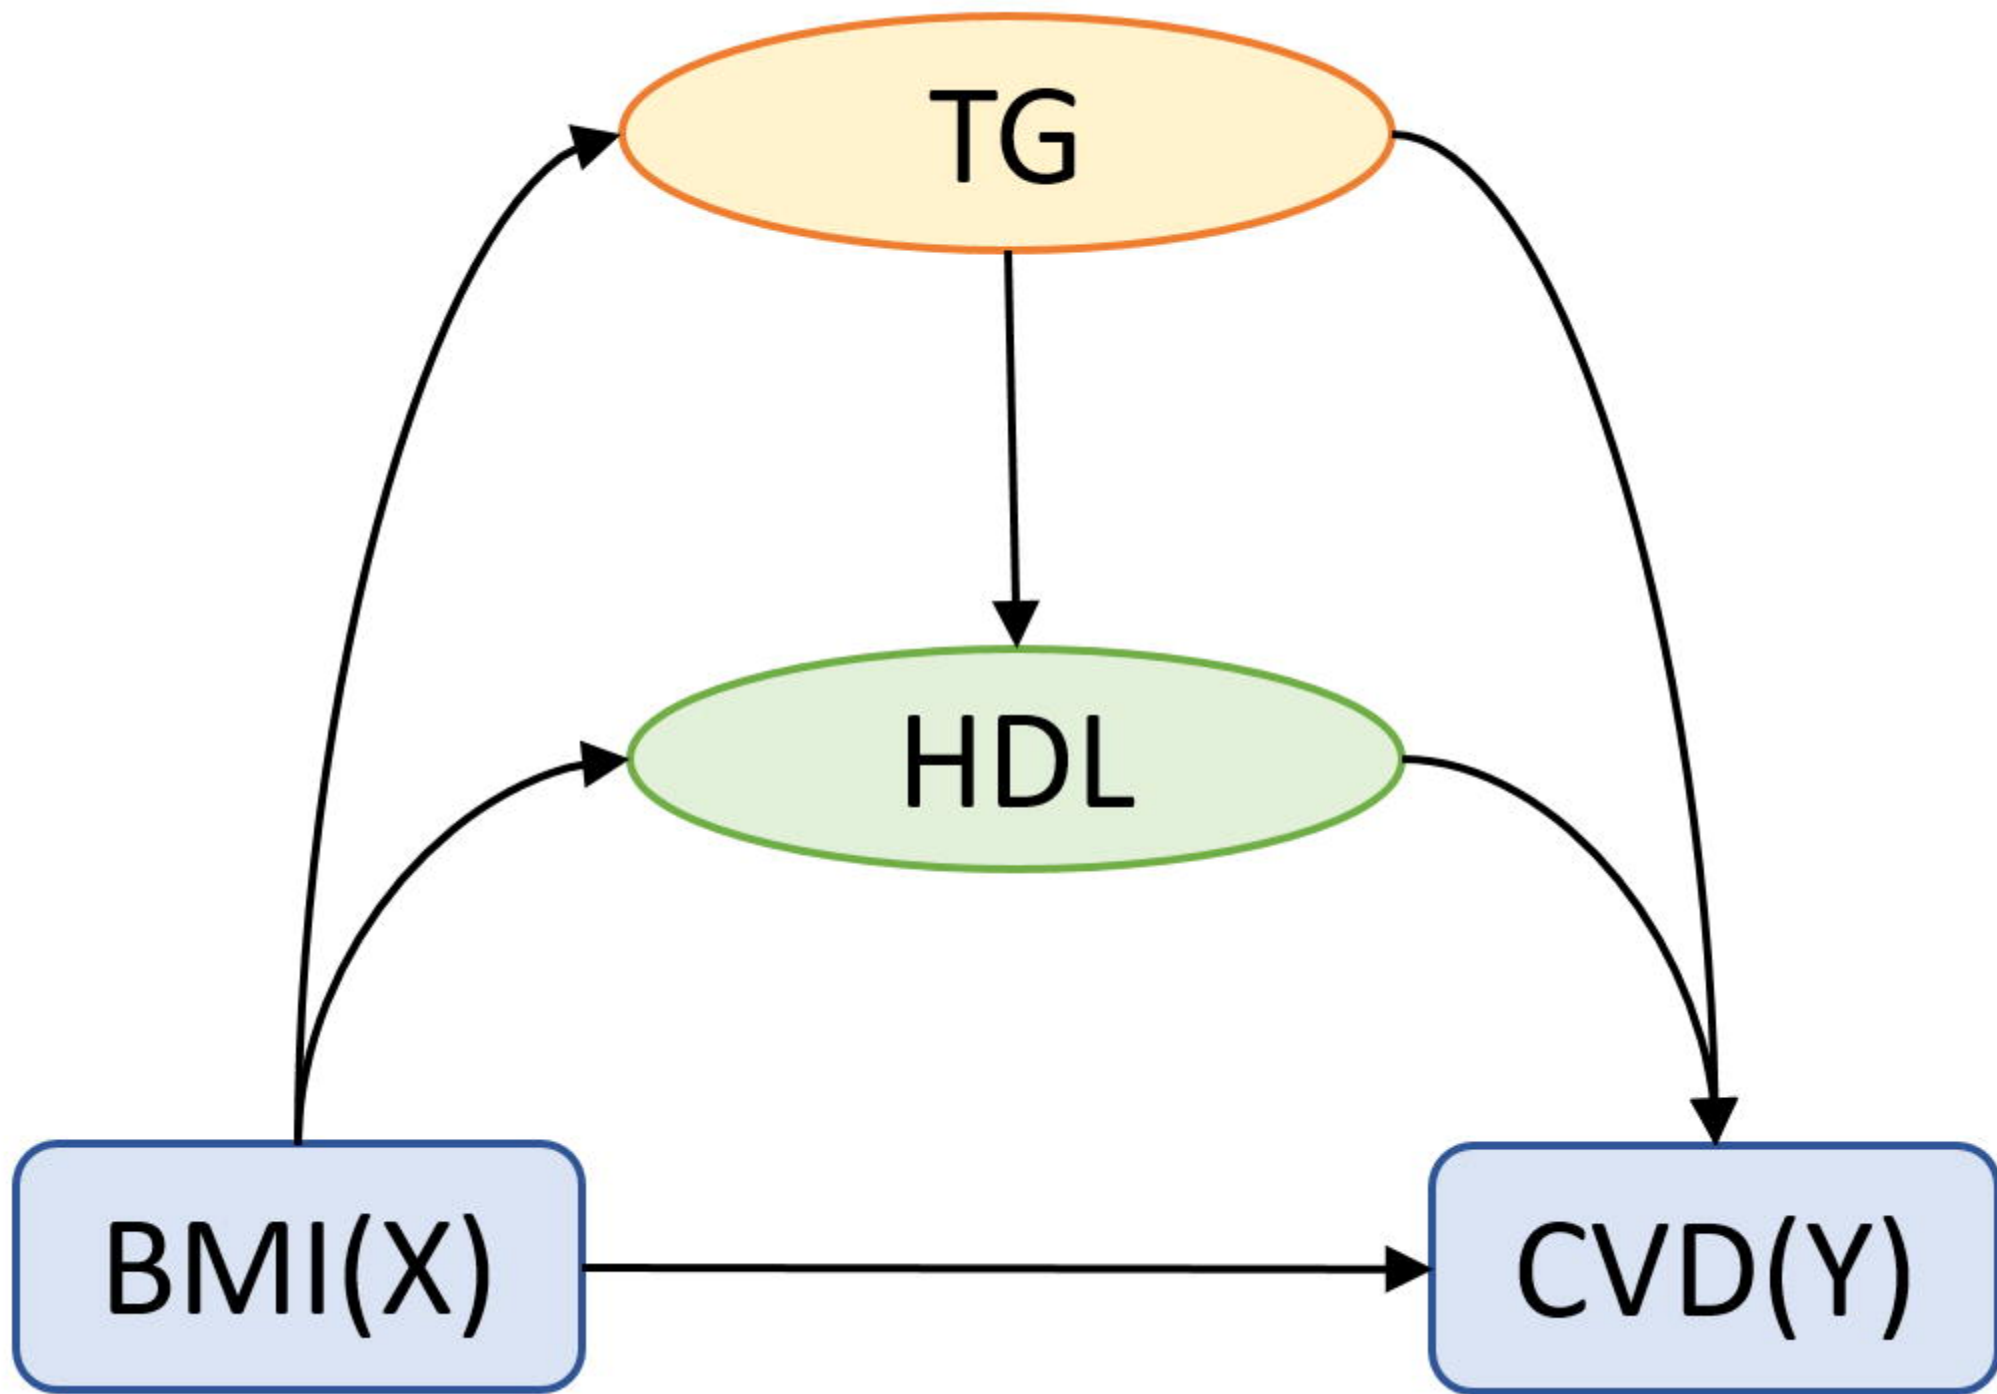

BMI→HDL→CVD  
OR: 1.054[1.034,1.101]  
MP: 27.1% [17.1, 38.2]

BMI→TG→CVD  
OR: 1.050[1.033,1.096]  
MP: 24.9% [16.3, 34.7]

BMI→TG→HDL→CVD  
OR: 1.047[1.005,1.101]  
MP: 23.7% [2.5, 49.3]
